# Supplementary material for: MIND Dietary Pattern and Its Association with Cognition and Incident Dementia in the UK Biobank
Source: MDPI journal article supplement (doi:10.3390/nu15010032), 2022-12-21
Supplement: s1 [file s1]

# Supplementary Materials

## Supplementary Methods

### *Cognitive function*

Tests administered at the assessment center (2006–2010) and in the following order include: Prospective memory (Part 1), Pairs matching, Fluid intelligence, Reaction time and Prospective memory (Part 2). Beginning in 2014, the following tests were completed on-line and at home: Fluid intelligence (excluded from current analysis), Trail Making Test A, Trail Making Test B, Symbol Digit substitution and then Pairs matching (excluded from current analysis). A digit recall test was only performed in a subset of the participants at baseline and was phased out during the latter part of recruitment and continued on-line. This test was not included for analysis given the different environments in which the tests were completed.

*Prospective Memory (PM) Test:* This test was added part-way through the baseline assessment period and completed at the assessment centers. Participants were given the following instructions: ‘At the end of the games we will show you four colored symbols and ask you to touch the blue square. However, to test your memory, we want you to actually touch the Orange Circle instead’. Participants were scored as zero or one, depending on whether they completed the task on first attempt or not. This test assesses PM: the ability to carry out future intentions at a specific time or in response to a specific event and therefore includes a prospective component (remembering to remember) and a retrospective component (remembering the content of what is to be remembered) [1,2].

*Pairs Matching (Pairs) Test:* This episodic visual memory test was completed at the assessment centers. Participants were shown 6 pairs of cards for 5 seconds, which were then turned over. Participants were instructed to select, from recall and in the fewest number of attempts, the pairs of cards that had matching symbols. There was no time limit and the participants could make as many attempts as they needed to find all the pairs. The memory test score in the present study is the total number of errors made during this task until the six pairs of identical cards were touched consecutively. We restricted our analyses to individuals who finished the test and log (+1) transformed the number of errors for the analysis. Transformation was necessary since the distribution of raw scores were zero-inflated and highly skewed to the right. During the pilot phase of the UK Biobank, a subset of participants completed this test twice in immediate succession and the intraclass correlation was 0.17 [3].

*Fluid Intelligence (FI) Test:* This test was added part-way through the baseline assessment period and completed at the assessment centers. Participants were presented with 13 verbal logic/reasoning-type multiple choice questions and had to answer as many as they could within 2 minutes. There were six verbal items and seven numerical items, involving sequence recognition and arithmetic. Incorrect or unattempted questions were scored as zero. The total number of correct answers (max 13) was normally distributed and used for our analysis. The Cronbach alpha coefficient for these items has been reported elsewhere as 0.62 [4]. The UK Biobank describes FI as the “capacity to solve problems that require logic and

---

reasoning ability, independent of acquired knowledge” [5]. Others have preferred the test label ‘verbal-numerical reasoning’ as opposed to the UK Biobank’s label ‘fluid Intelligence’ since performance on some items more likely rely on crystallized knowledge” [3,4,6–12].

*Reaction Time (RT) Test:* For this measure of simple processing speed, participants completed a timed test of symbol matching at the assessment centers. Participants were shown one pair of cards out of a set of 12 pairs. If both cards displayed a matching symbol, participants pressed a response button as quickly as possible using their dominant hand. Symbols included: equals-sign “=”, 3 overlapping triangles, hollow circle, hollow square, ruby-post “H”, smiley face, solid circle, solid square, triangle and cross “+”. Five ‘training’ trials were administered, followed by seven test trials. The score for analysis was the mean time (in milliseconds) to press the button, derived from the four trials in which a matching pair occurred. The UK Biobank indicates that i) times under 50 ms must be due to anticipation rather than reaction and so were excluded and ii) times over 2000 ms are ignored since cards had disappeared by then. For the current analysis additional potential outliers were truncated to 4 SD away from the mean. This approach generated better normally distributed scores than log-transformed scores. However, results were similar when log-transformed values were analyzed (data not shown). Cronbach’s alpha for this task has previously been reported as 0.85 [4].

*Symbol Digit Substitution (SDS) Test:* This test for complex processing speed was completed at follow-up (~2014) on home computers and involves matching numbers to a set of symbols. Participants are presented with symbols paired with digits and are asked to enter the digits that are paired with the symbols in the empty spaces. We used the number of correct substitutions for our analyses. Potential outliers were truncated to 4 SD away from the mean.

*Trail Making Test A and B:* These visual attention tests (or executive function) provide information on visual search, scanning, speed of processing, mental flexibility, and executive functions and were completed at follow-up on home computers (~2014). Participants were asked to connect scattered circles containing a sequence of numbers (Trail A) and then to connect circles containing numbers or letters by alternating between them in ascending sequence (Trail B). We used the time taken to complete these tests for our analyses, and these data were log-transformed to account for the right-skewed distribution of the raw scores.

**Supplementary Table S1. MIND score derivation in UK Biobank.**

| Diet component                                                                                                | UKB variable# | Label                                                                  | Coding (standard servings per day) | Component Score |        |       |
|---------------------------------------------------------------------------------------------------------------|---------------|------------------------------------------------------------------------|------------------------------------|-----------------|--------|-------|
|                                                                                                               |               |                                                                        |                                    | 0               | 0.5    | 1     |
| Green leafy vegetables                                                                                        | 103990        | Veg consumer (dep)                                                     | 0/1, N/Y                           |                 |        |       |
|                                                                                                               | 104090        | Side salad (1/2)                                                       | 444/555/1/2/300, ¼ / ½ /1/2/3+     |                 |        |       |
|                                                                                                               | 104160        | Cabbage/kale                                                           | 444/555/1/2/300, ¼ / ½ /1/2/3+     |                 |        |       |
|                                                                                                               | 104240        | Lettuce                                                                | 444/555/1/2/300, ¼ / ½ /1/2/3+     |                 |        |       |
|                                                                                                               | 104300        | Spinach                                                                | 444/555/1/2/300, ¼ / ½ /1/2/3+     |                 |        |       |
|                                                                                                               | 104370        | Watercress                                                             | 444/555/1/2/300, ¼ / ½ /1/2/3+     |                 |        |       |
|                                                                                                               | 104080        | Coleslaw (cabbage)                                                     | 444/555/1/2/300, ¼ / ½ /1/2/3+     |                 |        |       |
|                                                                                                               |               | *1 serving side salad = ½ serving greens + ½ serving “other vegetable” |                                    |                 |        |       |
| Used mean intake across diet records for each item then summed item means for daily servings. Applied points. |               |                                                                        |                                    | ≤2/wk           | 2<6/wk | 6+/wk |
| Other vegetables                                                                                              | 103990        | Veg consumer (dep)                                                     | 0/1, N/Y                           |                 |        |       |
|                                                                                                               | 104090        | Side salad (1/2)                                                       | 444/555/1/2/300, ¼ / ½ /1/2/3+     |                 |        |       |
|                                                                                                               | 104060        | Mixed veg                                                              | 444/555/1/2/300, ¼ / ½ /1/2/3+     |                 |        |       |
|                                                                                                               | 104070        | Veg pieces                                                             | 444/555/1/2/300, ¼ / ½ /1/2/3+     |                 |        |       |
|                                                                                                               | 104120        | Green beans                                                            | 444/555/1/2/300, ¼ / ½ /1/2/3+     |                 |        |       |
|                                                                                                               | 104130        | Beet root                                                              | 444/555/1/2/300, ¼ / ½ /1/2/3+     |                 |        |       |
|                                                                                                               | 104140        | Broccoli                                                               | 444/555/1/2/300, ¼ / ½ /1/2/3+     |                 |        |       |
|                                                                                                               | 104150        | Butternut squash                                                       | 444/555/1/2/300, ¼ / ½ /1/2/3+     |                 |        |       |
|                                                                                                               | 104170        | Carrot                                                                 | 444/555/1/2/300, ¼ / ½ /1/2/3+     |                 |        |       |
|                                                                                                               | 104180        | Cauliflower                                                            | 444/555/1/2/300, ¼ / ½ /1/2/3+     |                 |        |       |
|                                                                                                               | 104190        | Celery                                                                 | 444/555/1/2/300, ¼ / ½ /1/2/3+     |                 |        |       |
|                                                                                                               | 104200        | Courgetti/zuch                                                         | 444/555/1/2/300, ¼ / ½ /1/2/3+     |                 |        |       |
|                                                                                                               | 104210        | Cucumber                                                               | 444/555/1/2/300, ¼ / ½ /1/2/3+     |                 |        |       |
|                                                                                                               | 104220        | Garlic                                                                 | 444/555/1/2/300, ¼ / ½ /1/2/3+     |                 |        |       |
|                                                                                                               | 104230        | Leek                                                                   | 444/555/1/2/300, ¼ / ½ /1/2/3+     |                 |        |       |
|                                                                                                               | 104250        | Mushroom                                                               | 444/555/1/2/300, ¼ / ½ /1/2/3+     |                 |        |       |
|                                                                                                               | 104260        | Onion                                                                  | 444/555/1/2/300, ¼ / ½ /1/2/3+     |                 |        |       |
|                                                                                                               | 104270        | Parsnip                                                                | 444/555/1/2/300, ¼ / ½ /1/2/3+     |                 |        |       |
|                                                                                                               | 104280        | Pea (frozen, fresh, tinned)                                            | 444/555/1/2/300, ¼ / ½ /1/2/3+     |                 |        |       |
|                                                                                                               | 104290        | Sweet pepper                                                           | 444/555/1/2/300, ¼ / ½ /1/2/3+     |                 |        |       |
|                                                                                                               | 104310        | Sprouts                                                                | 444/555/1/2/300, ¼ / ½ /1/2/3+     |                 |        |       |

|                                                                                                              |                                                                                                              |                                          |                                |         |          |       |
|--------------------------------------------------------------------------------------------------------------|--------------------------------------------------------------------------------------------------------------|------------------------------------------|--------------------------------|---------|----------|-------|
|                                                                                                              | 104320                                                                                                       | Sweetcorn                                | 444/555/1/2/300, ¼ / ½ /1/2/3+ |         |          |       |
|                                                                                                              | 104330                                                                                                       | Sweet potato                             | 444/555/1/2/300, ¼ / ½ /1/2/3+ |         |          |       |
|                                                                                                              | 104340                                                                                                       | Fresh tomato                             | 444/555/1/2/300, ¼ / ½ /1/2/3+ |         |          |       |
|                                                                                                              | 104350                                                                                                       | Tinned tomato                            | 444/555/1/2/300, ¼ / ½ /1/2/3+ |         |          |       |
|                                                                                                              | 104360                                                                                                       | Turnip/swede                             | 444/555/1/2/300, ¼ / ½ /1/2/3+ |         |          |       |
|                                                                                                              | 104380                                                                                                       | Other veg                                | 444/555/1/2/300, ¼ / ½ /1/2/3+ |         |          |       |
|                                                                                                              | 102520                                                                                                       | Soup consumer (dep)                      | 0/1, N/Y                       |         |          |       |
|                                                                                                              | 102540                                                                                                       | Canned (dep)                             | 555/1/2/3/400, ½ /1/2/3/4+     |         |          |       |
|                                                                                                              | 102620                                                                                                       | Homemade (dep)                           | 555/1/2/3/400, ½ /1/2/3/4+     |         |          |       |
|                                                                                                              | 20108                                                                                                        | Ingredients in canned soup               | 5, vegetables                  |         |          |       |
|                                                                                                              | 20109                                                                                                        | Ingredients in homemade soup             | 5, vegetables                  |         |          |       |
|                                                                                                              | 103310                                                                                                       | Spreads/sauces consumers (dep)           | 0/1, N/Y                       |         |          |       |
|                                                                                                              | 20088                                                                                                        | Types of spreads/sauces consumed         |                                |         |          |       |
|                                                                                                              |                                                                                                              | Tomato sauce                             | 346 (max 1 serving)            |         |          |       |
|                                                                                                              |                                                                                                              | *unable to separate pure fruit/veg juice |                                |         |          |       |
|                                                                                                              |                                                                                                              | *1veg soup= ¼ veg serving                |                                |         |          |       |
| Used mean intake across diet records for each item then summed item means for daily servings. Applied points |                                                                                                              |                                          |                                | <5/wk   | 5<7/wk   | 7+/wk |
| Berries                                                                                                      | 104400                                                                                                       | Fruit consumer (dep)                     | 0/1, N/Y                       |         |          |       |
|                                                                                                              | 104470                                                                                                       | Berry                                    | 555/1/2/3/400, ½ /1/2/3/4+     |         |          |       |
|                                                                                                              | Used mean intake across diet records for daily servings. Applied points                                      |                                          |                                | <1/wk   | 1/wk     | 2+/wk |
| Nuts                                                                                                         | 102400                                                                                                       | Savory snack consumer (dep)              | 0/1, N/Y                       |         |          |       |
|                                                                                                              | 102430                                                                                                       | Salted nuts                              | 555/1/2/300, ½ /1/2/3+         |         |          |       |
|                                                                                                              | 102410                                                                                                       | Salted peanuts                           | 555/1/2/300, ½ /1/2/3+         |         |          |       |
|                                                                                                              | 102450                                                                                                       | Seeds                                    | 555/1/2/300, ½ /1/2/3+         |         |          |       |
|                                                                                                              | 102440                                                                                                       | Unsalted nuts                            | 555/1/2/300, ½ /1/2/3+         |         |          |       |
|                                                                                                              | 102420                                                                                                       | Unsalted peanuts                         | 555/1/2/300, ½ /1/2/3+         |         |          |       |
|                                                                                                              | 103310                                                                                                       | Spreads/sauces consumers (dep)           | 0/1, N/Y                       |         |          |       |
|                                                                                                              | 20088                                                                                                        | Types of spreads/sauces consumed         |                                |         |          |       |
|                                                                                                              |                                                                                                              | Peanut butter                            | 334 (assumed 1 serving)        |         |          |       |
|                                                                                                              | Used mean intake across diet records for each item then summed item means for daily servings. Applied points |                                          |                                | <0.5/wk | 0.5-4/wk | >4/wk |

|                  |                                                                                                                                                                                                                                                        |                                                                                                                                                                                                                                                                                                                                                                                                                                                                                                                                                                                                                                                                                                                                                                     |                                                                                                                                                                                                                               |    |  |     |
|------------------|--------------------------------------------------------------------------------------------------------------------------------------------------------------------------------------------------------------------------------------------------------|---------------------------------------------------------------------------------------------------------------------------------------------------------------------------------------------------------------------------------------------------------------------------------------------------------------------------------------------------------------------------------------------------------------------------------------------------------------------------------------------------------------------------------------------------------------------------------------------------------------------------------------------------------------------------------------------------------------------------------------------------------------------|-------------------------------------------------------------------------------------------------------------------------------------------------------------------------------------------------------------------------------|----|--|-----|
| Olive oil        | 20090                                                                                                                                                                                                                                                  | Type of fat/oil used in cooking yesterday<br>(list of 29, check any, y/n)<br>Olive oil<br><br>*did not include olive oil-based<br>spreads/margarines since these contain only<br>20-30% olive oil.                                                                                                                                                                                                                                                                                                                                                                                                                                                                                                                                                                  | 353                                                                                                                                                                                                                           |    |  |     |
|                  | Olive oil is primary cooking oil (pt_molive=1) if participant used any olive oil in cooking across all diet records (regardless of whether they reported use of other fats in cooking as well; 20090 is not exclusive variable), otherwise pt_molive=0 |                                                                                                                                                                                                                                                                                                                                                                                                                                                                                                                                                                                                                                                                                                                                                                     |                                                                                                                                                                                                                               | No |  | Yes |
| Butter/margarine | 103990<br>104030<br>104040<br><br>101300<br>20087                                                                                                                                                                                                      | Vegetable consumers (dep)<br>Boiled/baked potatoes intake (dep)<br>Butter/margarine added to potatoes<br><br>But/marg on brd/crack (dep)<br>Types of spread used on brd/crack<br>Butter<br>Spreadable butter<br>Low fat butter<br>Normal fat butter<br>Unknown type of butter<br>Olive spread<br>Very low fat olive spread<br>Low fat olive spread<br>Normal fat olive spread<br>Cholesterol-lowering olive spread<br>Unknown olive spread<br>Polyunsaturated margarine<br>Very low fat polyunsaturated margarine<br>Low fat polyunsaturated margarine<br>Normal fat polyunsaturated margarine<br>Cholesterol-lowering polyunsaturated<br>margarine<br>Unknown polyunsaturated margarine<br>Soya margarine<br>Very low fat soya margarine<br>Low fat soya margarine | 0/1, N/Y<br>444/555/1/2/300, ¼ / ½ /1/2/3+<br>0/1, N/Y<br><br>0/1, N/Y<br><br>159<br>160<br>161<br>162<br>163<br>164<br>165<br>166<br>167<br>168<br>169<br>170<br>171<br>172<br>173<br>174<br>175<br>182<br>183<br>184<br>185 |    |  |     |

|              |                                                                                                                                                                                                                                                                                                                                                                                                                                                                                 |                                                                                                                                                                                                                                                                                                                                                                                                               |                                                             |       |        |       |
|--------------|---------------------------------------------------------------------------------------------------------------------------------------------------------------------------------------------------------------------------------------------------------------------------------------------------------------------------------------------------------------------------------------------------------------------------------------------------------------------------------|---------------------------------------------------------------------------------------------------------------------------------------------------------------------------------------------------------------------------------------------------------------------------------------------------------------------------------------------------------------------------------------------------------------|-------------------------------------------------------------|-------|--------|-------|
|              |                                                                                                                                                                                                                                                                                                                                                                                                                                                                                 | Normal fat soya margarine<br>Cholesterol-lowering soya margarine<br>Unknown soya margarine<br>Unknown margarine<br>Very low fat unknown margarine<br>Low fat unknown margarine<br>Unknown fat unknown margarine<br>Cholesterol lowering unknown margarine<br>Unknown margarine<br>Hard margarine<br><br>Did not consider data concerning thickness of spread on bread or whether butter/margarine was low-fat | 186<br>187<br>188<br>189<br>190<br>191<br>192<br>193<br>194 |       |        |       |
|              | Since 20087 is not an exclusive variable, we derived a “servings of butter/marg on bread” variable weighted by response (i.e if a non-butter/margarine spread and butter/margarine used, assumed 0.5*servings of bread with butter/marg). Assumed 1 serving (1 pat/tsp) butter/marg per serving of bread or potato. Used mean intake across diet records for each item (butter/marg on potatoes and bread) then summed item means for daily servings. Applied (reverse) points. |                                                                                                                                                                                                                                                                                                                                                                                                               |                                                             | <1/d  | 1-2/d  | >2/d  |
| Cheese       | 102800                                                                                                                                                                                                                                                                                                                                                                                                                                                                          | Cheese consumers (dep)                                                                                                                                                                                                                                                                                                                                                                                        | 0/1, N/Y                                                    |       |        |       |
|              | 102820                                                                                                                                                                                                                                                                                                                                                                                                                                                                          | Hard cheese                                                                                                                                                                                                                                                                                                                                                                                                   | 555/1/2/300, ½ /1/2/3+                                      |       |        |       |
|              | 102830                                                                                                                                                                                                                                                                                                                                                                                                                                                                          | Soft cheese                                                                                                                                                                                                                                                                                                                                                                                                   | 555/1/2/300, ½ /1/2/3+                                      |       |        |       |
|              | 102840                                                                                                                                                                                                                                                                                                                                                                                                                                                                          | Blue cheese                                                                                                                                                                                                                                                                                                                                                                                                   | 555/1/2/300, ½ /1/2/3+                                      |       |        |       |
|              | 102860                                                                                                                                                                                                                                                                                                                                                                                                                                                                          | Cheese spread                                                                                                                                                                                                                                                                                                                                                                                                 | 555/1/2/300, ½ /1/2/3+                                      |       |        |       |
|              | 102870                                                                                                                                                                                                                                                                                                                                                                                                                                                                          | Cottage cheese                                                                                                                                                                                                                                                                                                                                                                                                | 555/1/2/300, ½ /1/2/3+                                      |       |        |       |
|              | 102880                                                                                                                                                                                                                                                                                                                                                                                                                                                                          | Feta                                                                                                                                                                                                                                                                                                                                                                                                          | 555/1/2/300, ½ /1/2/3+                                      |       |        |       |
|              | 102890                                                                                                                                                                                                                                                                                                                                                                                                                                                                          | Mozzarella                                                                                                                                                                                                                                                                                                                                                                                                    | 555/1/2/300, ½ /1/2/3+                                      |       |        |       |
|              | 102900                                                                                                                                                                                                                                                                                                                                                                                                                                                                          | Goat's cheese                                                                                                                                                                                                                                                                                                                                                                                                 | 555/1/2/300, ½ /1/2/3+                                      |       |        |       |
|              | 102910                                                                                                                                                                                                                                                                                                                                                                                                                                                                          | Other cheese                                                                                                                                                                                                                                                                                                                                                                                                  | 555/1/2/300, ½ /1/2/3+                                      |       |        |       |
|              |                                                                                                                                                                                                                                                                                                                                                                                                                                                                                 | *did not use low fat versions                                                                                                                                                                                                                                                                                                                                                                                 |                                                             |       |        |       |
|              | Used mean intake across diet records for each item then summed item means for daily servings. Applied (reverse) points                                                                                                                                                                                                                                                                                                                                                          |                                                                                                                                                                                                                                                                                                                                                                                                               |                                                             | 6+/wk | 1<6/wk | <1/wk |
| Whole grains | 100760                                                                                                                                                                                                                                                                                                                                                                                                                                                                          | Breakfast cereal consumer (dep)                                                                                                                                                                                                                                                                                                                                                                               | 0/1, N/Y                                                    |       |        |       |
|              | 100770                                                                                                                                                                                                                                                                                                                                                                                                                                                                          | Porridge                                                                                                                                                                                                                                                                                                                                                                                                      | 555/1/200, ½ /1/2+                                          |       |        |       |

|                  |                                                                                                                                                                                                                                              |                                                                                                                                                                                                                                                                                                                                                                                                                                                                 |                                                                                                                                                                                                                                                                                                                                                                                                                                                                                                                                              |      |       |       |
|------------------|----------------------------------------------------------------------------------------------------------------------------------------------------------------------------------------------------------------------------------------------|-----------------------------------------------------------------------------------------------------------------------------------------------------------------------------------------------------------------------------------------------------------------------------------------------------------------------------------------------------------------------------------------------------------------------------------------------------------------|----------------------------------------------------------------------------------------------------------------------------------------------------------------------------------------------------------------------------------------------------------------------------------------------------------------------------------------------------------------------------------------------------------------------------------------------------------------------------------------------------------------------------------------------|------|-------|-------|
|                  | 100800<br>100840<br>100850<br><br>100940<br>100950<br>20091<br>101020<br>20092<br>101090<br>20093<br>101160<br>20094<br>101250<br>101260<br><br>102700<br>102720<br>102740<br>102780                                                         | Muesli<br>Bran cereal<br>Whole-wheat cereal<br><br>Bread consumer (dep)<br>Sliced bread (dep)<br>Type of sliced bread eaten (>1 option)<br>Baguette (dep)<br>Type of baguette eaten (>1 option)<br>Bap (dep)<br>Type of large bap eaten (>1 option)<br>Bread roll (dep)<br>Type of bread roll eaten (>1 option)<br>Crispbread<br>Oatcakes<br><br>Starchy food consumer (dep)<br>Wholemeal pasta<br>Brown rice<br>Other grain ("bulgar, wheat, millett, barley") | 555/1/200, ½ /1/2+<br>555/1/200, ½ /1/2+<br>555/1/200, ½ /1/2+<br><br>0/1, N/Y<br>555/1/2/3/4/5/600, ½ /1/2/3/4/5/6+<br>1/2/3/4/5, whi/mix/ww/seed/oth<br>555/1/2/3/4/5/600, ½ /1/2/3/4/5/6+<br>1/2/3/4/5, whi/mix/ww/seed/oth<br>555/1/2/3/4/5/600, ½ /1/2/3/4/5/6+<br>1/2/3/4/5, whi/mix/ww/seed/oth<br>555/1/2/3/4/5/600, ½ /1/2/3/4/5/6+<br>1/2/3/4/5, whi/mix/ww/seed/oth<br>555/1/2/3/4/5/600, ½ /1/2/3/4/5/6+<br>555/1/2/3/4/5/600, ½ /1/2/3/4/5/6+<br><br>0/1, N/Y<br>555/1/200, ½ /1/2+<br>555/1/200, ½ /1/2+<br>555/1/200, ½ /1/2+ |      |       |       |
|                  | Since 20091, 20092, 20093, 20094 are not exclusive, we derived a "servings of whole-wheat bread" variable weighted by response. Used mean intake across diet records for each item then summed item means for daily servings. Applied points |                                                                                                                                                                                                                                                                                                                                                                                                                                                                 |                                                                                                                                                                                                                                                                                                                                                                                                                                                                                                                                              | <1/d | 1-2/d | >2/d  |
| Fish (not fried) | 103140<br>103150<br>103160<br>103190<br>103200<br>103210<br>103220<br>103230                                                                                                                                                                 | Fish consumer (dep)<br>Tinned tuna<br>Oily fish<br>White fish<br>Prawns<br>Lobster/crab<br>Shellfish<br>Other fish                                                                                                                                                                                                                                                                                                                                              | 0/1, N/Y<br>555/1/2/3/400, ½ /1/2/3/4+<br>555/1/2/3/400, ½ /1/2/3/4+                                                                                                                                                                                                                                                                                     |      |       |       |
|                  | Used mean intake across diet records for each item then summed item means for daily servings. Applied points                                                                                                                                 |                                                                                                                                                                                                                                                                                                                                                                                                                                                                 |                                                                                                                                                                                                                                                                                                                                                                                                                                                                                                                                              | <1/m | 1+/m  | 1+/wk |
| Beans            | 103990<br>104000                                                                                                                                                                                                                             | Vegetable consumers (dep)<br>Baked bean                                                                                                                                                                                                                                                                                                                                                                                                                         | 0/1, N/Y<br>444/555/1/2/300, ¼ / ½ /1/2/3+                                                                                                                                                                                                                                                                                                                                                                                                                                                                                                   |      |       |       |

|                                                                                                              |                                                                                                                        |                                                                             |                                |       |        |       |
|--------------------------------------------------------------------------------------------------------------|------------------------------------------------------------------------------------------------------------------------|-----------------------------------------------------------------------------|--------------------------------|-------|--------|-------|
|                                                                                                              | 104010                                                                                                                 | Pulses                                                                      | 444/555/1/2/300, ¼ / ½ /1/2/3+ |       |        |       |
|                                                                                                              | 104110                                                                                                                 | Broad bean                                                                  | 444/555/1/2/300, ¼ / ½ /1/2/3+ |       |        |       |
|                                                                                                              | 102520                                                                                                                 | Soup consumer (dep)                                                         | 0/1, N/Y                       |       |        |       |
|                                                                                                              | 102540                                                                                                                 | Canned (dep)                                                                | 555/1/2/3/400, ½ /1/2/3/4+     |       |        |       |
|                                                                                                              | 102620                                                                                                                 | Homemade (dep)                                                              | 555/1/2/3/400, ½ /1/2/3/4+     |       |        |       |
|                                                                                                              | 20108                                                                                                                  | Ingredients in canned soup (>1 option)                                      | 4, pulses                      |       |        |       |
|                                                                                                              | 20109                                                                                                                  | Ingredients in homemade soup (>1 option)<br>*1 bean soup= 0.25 bean serving | 4, pulses                      |       |        |       |
|                                                                                                              | 103310                                                                                                                 | Spreads/sauces consumers (dep)                                              | 0/1, N/Y                       |       |        |       |
|                                                                                                              | 20088                                                                                                                  | Types of spreads/sauces consumed<br>Hummus                                  | 336                            |       |        |       |
|                                                                                                              | 103250                                                                                                                 | Vegetarian alternatives intake (dep)                                        | 0/1, N/Y                       |       |        |       |
|                                                                                                              | 103270                                                                                                                 | Tofu intake                                                                 | 555/1/2/3/400, ½ /1/2/3/4+     |       |        |       |
| Used mean intake across diet records for each item then summed item means for daily servings. Applied points |                                                                                                                        |                                                                             |                                | <1    | 1-3/wk | >3/wk |
| Poultry (not fried)                                                                                          | 103000                                                                                                                 | Meat consumers (dep)                                                        | 0/1, N/Y                       |       |        |       |
|                                                                                                              | 103060                                                                                                                 | Poultry intake (dep)                                                        | 555/1/2/3/4/500, ½ /1/2/3/4/5+ |       |        |       |
|                                                                                                              | Used mean intake across diet records for “mpoultry”. Applied points                                                    |                                                                             |                                | <1/wk | 1/wk   | 2+/wk |
| Red meat & products                                                                                          | 103000                                                                                                                 | Meat consumers (dep)                                                        | 0/1, N/Y                       |       |        |       |
|                                                                                                              | 103010                                                                                                                 | Sausage                                                                     | 555/1/2/3/4/500, ½ /1/2/3/4/5+ |       |        |       |
|                                                                                                              | 103020                                                                                                                 | Beef                                                                        | 555/1/2/3/4/500, ½ /1/2/3/4/5+ |       |        |       |
|                                                                                                              | 103030                                                                                                                 | Pork                                                                        | 555/1/2/3/4/500, ½ /1/2/3/4/5+ |       |        |       |
|                                                                                                              | 103040                                                                                                                 | Lamb                                                                        | 555/1/2/3/4/500, ½ /1/2/3/4/5+ |       |        |       |
|                                                                                                              | 103070                                                                                                                 | Bacon                                                                       | 555/1/2/3/4/500, ½ /1/2/3/4/5+ |       |        |       |
|                                                                                                              | 103080                                                                                                                 | Ham                                                                         | 555/1/2/3/4/500, ½ /1/2/3/4/5+ |       |        |       |
|                                                                                                              | Used mean intake across diet records for each item then summed item means for daily servings. Applied (reverse) points |                                                                             |                                | >6/wk | 4-6/wk | <4/wk |
| Fast/fried foods                                                                                             | 103000                                                                                                                 | Meat consumers (dep)                                                        | 0/1, N/Y                       |       |        |       |
|                                                                                                              | 103050                                                                                                                 | Crumbed or deep-fried poultry                                               | 555/1/2/3/4/500, ½ /1/2/3/4/5+ |       |        |       |
|                                                                                                              | 103140                                                                                                                 | Fish consumer (dep)                                                         | 0/1, N/Y                       |       |        |       |
|                                                                                                              | 103170                                                                                                                 | Breaded fish                                                                | 555/1/2/3/400, ½ /1/2/3/4+     |       |        |       |
|                                                                                                              | 103180                                                                                                                 | Battered fish                                                               | 555/1/2/3/400, ½ /1/2/3/4+     |       |        |       |

|                                                                                                                        |                                                                                                                                                                                                    |                                                                                                                                                                                                                                                                                                                                                         |                                                                                                                                                                                                                                                                                                                                                                                                                                                                                                                            |       |        |       |
|------------------------------------------------------------------------------------------------------------------------|----------------------------------------------------------------------------------------------------------------------------------------------------------------------------------------------------|---------------------------------------------------------------------------------------------------------------------------------------------------------------------------------------------------------------------------------------------------------------------------------------------------------------------------------------------------------|----------------------------------------------------------------------------------------------------------------------------------------------------------------------------------------------------------------------------------------------------------------------------------------------------------------------------------------------------------------------------------------------------------------------------------------------------------------------------------------------------------------------------|-------|--------|-------|
|                                                                                                                        | 103990<br>104020                                                                                                                                                                                   | Vegetable consumers (dep)<br>Fried potatoes                                                                                                                                                                                                                                                                                                             | 0/1, N/Y<br>444/555/1/2/300, ¼ / ½ /1/2/3+                                                                                                                                                                                                                                                                                                                                                                                                                                                                                 |       |        |       |
|                                                                                                                        | 102400<br>102460                                                                                                                                                                                   | Savoury snack consumers (dep)<br>Crisp/chips<br><br>*did not include 'pizza' : "How many medium slices of pizza did you have? N.B. Fillings and toppings should be recorded later."<br>Pizza type unclear and may have been "double counting" with other MIND items above.                                                                              | 0/1, N/Y<br>555/1/2/300, ½ /1/2/3+                                                                                                                                                                                                                                                                                                                                                                                                                                                                                         |       |        |       |
| Used mean intake across diet records for each item then summed item means for daily servings. Applied (reverse) points |                                                                                                                                                                                                    |                                                                                                                                                                                                                                                                                                                                                         |                                                                                                                                                                                                                                                                                                                                                                                                                                                                                                                            | >3/wk | 1-3/wk | <1/wk |
| Pastries and sweets                                                                                                    | 101970<br>101980<br>101990<br>102010<br>102020<br>102030<br>102050<br>102060<br>102070<br><br>102080<br>102120<br><br>102130<br>102140<br>102150<br>102170<br>102180<br>102190<br>102200<br>102210 | Double crust pastry<br>Single crust pastry<br>Crumble<br>Pancake<br>Scotch pancake<br>Yorkshire pudding<br>Croissant<br>Danish pastry<br>Scone<br><br>Yogurt/ice-cream consumers (dep)<br>Ice-cream<br><br>Dessert consumers (dep)<br>Milk-based pudding<br>Other milk-based pudding<br>Soya dessert<br>Fruitcake<br>Cake<br>Doughnut<br>Sponge pudding | 555/1/2/3/400, ½ /1/2/3/4+<br>555/1/2/3/400, ½ /1/2/3/4+<br><br>0/1, N/Y<br>555/1/2/300, ½ /1/2/3+<br><br>0/1, N/Y<br>555/1/2/300, ½ /1/2/3+<br>555/1/2/300, ½ /1/2/3+<br>555/1/2/300, ½ /1/2/3+<br>555/1/2/300, ½ /1/2/3+<br>555/1/2/300, ½ /1/2/3+<br>555/1/2/300, ½ /1/2/3+<br>555/1/2/300, ½ /1/2/3+ |       |        |       |

|      |                                                                                                                        |                                                                                                                                                                                   |                                                                             |       |        |       |
|------|------------------------------------------------------------------------------------------------------------------------|-----------------------------------------------------------------------------------------------------------------------------------------------------------------------------------|-----------------------------------------------------------------------------|-------|--------|-------|
|      | 102220                                                                                                                 | Cheesecake                                                                                                                                                                        | 555/1/2/300, ½ /1/2/3+                                                      |       |        |       |
|      | 102230                                                                                                                 | Other dessert                                                                                                                                                                     | 555/1/2/300, ½ /1/2/3+                                                      |       |        |       |
|      | 102250                                                                                                                 | Sweet snack consumers (dep)                                                                                                                                                       | 0/1, N/Y                                                                    |       |        |       |
|      | 102260                                                                                                                 | Chocolate bar                                                                                                                                                                     | 444/555/1/2/3/4/500, ¼ / ½ /1/2/3/4/5+                                      |       |        |       |
|      | 102270                                                                                                                 | White chocolate                                                                                                                                                                   | 444/555/1/2/3/4/500, ¼ / ½ /1/2/3/4/5+                                      |       |        |       |
|      | 102280                                                                                                                 | Milk chocolate                                                                                                                                                                    | 444/555/1/2/3/4/500, ¼ / ½ /1/2/3/4/5+                                      |       |        |       |
|      | 102290                                                                                                                 | Dark chocolate                                                                                                                                                                    | 444/555/1/2/3/4/500, ¼ / ½ /1/2/3/4/5+                                      |       |        |       |
|      | 102300                                                                                                                 | Chocolate-covered raisin                                                                                                                                                          | 444/555/1/2/3/4/500, ¼ / ½ /1/2/3/4/5+                                      |       |        |       |
|      | 102310                                                                                                                 | Chocolate sweet                                                                                                                                                                   | 444/555/1/2/3/4/500, ¼ / ½ /1/2/3/4/5+                                      |       |        |       |
|      | 102330                                                                                                                 | Sweets                                                                                                                                                                            | 444/555/1/2/3/4/500, ¼ / ½ /1/2/3/4/5+                                      |       |        |       |
|      | 102340                                                                                                                 | Chocolate-covered biscuits                                                                                                                                                        | 444/555/1/2/3/4/500, ¼ / ½ /1/2/3/4/5+                                      |       |        |       |
|      | 102350                                                                                                                 | Chocolate biscuits                                                                                                                                                                | 444/555/1/2/3/4/500, ¼ / ½ /1/2/3/4/5+                                      |       |        |       |
|      | 102360                                                                                                                 | Sweet biscuits                                                                                                                                                                    | 444/555/1/2/3/4/500, ¼ / ½ /1/2/3/4/5+                                      |       |        |       |
|      | 102370                                                                                                                 | Cereal bar                                                                                                                                                                        | 444/555/1/2/3/4/500, ¼ / ½ /1/2/3/4/5+                                      |       |        |       |
|      | 102380                                                                                                                 | Other sweets                                                                                                                                                                      | 444/555/1/2/3/4/500, ¼ / ½ /1/2/3/4/5+                                      |       |        |       |
|      | 100530                                                                                                                 | Flavored milk intake                                                                                                                                                              | 555/1/2/3/4/5/600, ½ /1/2/3/4/5/6+                                          |       |        |       |
|      | 100550                                                                                                                 | Hot chocolate intake                                                                                                                                                              | 555/1/2/3/4/5/600, ½ /1/2/3/4/5/6+                                          |       |        |       |
|      | 100170                                                                                                                 | Fizzy drink intake                                                                                                                                                                | 555/1/2/3/4/5/600, ½ /1/2/3/4/5/6+                                          |       |        |       |
|      | 100180                                                                                                                 | Squash intake                                                                                                                                                                     | 555/1/2/3/4/5/600, ½ /1/2/3/4/5/6+                                          |       |        |       |
|      | 26064                                                                                                                  | Added sugars and preserves: derived from UKB diet committee and includes table sugar added to coffee, tea and cereal (semi-quantified), as well as jam, honey and syrup (binary). | g<br>to align this variable with other sweet foods, assumed 1 serving= 15 g |       |        |       |
|      | Used mean intake across diet records for each item then summed item means for daily servings. Applied (reverse) points |                                                                                                                                                                                   |                                                                             | 7+/wk | 5-6/wk | <5/wk |
| Wine | 100580                                                                                                                 | Alcohol consumed (dep)                                                                                                                                                            | 0/1, N/Y                                                                    |       |        |       |
|      | 100590                                                                                                                 | Red wine                                                                                                                                                                          | 555/1/2/3/4/5/600, ½ /1/2/3/4/5/6+                                          |       |        |       |
|      | 20096                                                                                                                  | Size of red wine glass drunk (>1 option)                                                                                                                                          | 1/2/3, 125/175/250ml                                                        |       |        |       |
|      | 100630                                                                                                                 | Rose wine                                                                                                                                                                         | 555/1/2/3/4/5/600, ½ /1/2/3/4/5/6+                                          |       |        |       |
|      | 20097                                                                                                                  | Size of rose wine glass drunk (>1 option)                                                                                                                                         | 1/2/3, 125/175/250ml                                                        |       |        |       |
|      | 100670                                                                                                                 | White wine                                                                                                                                                                        | 555/1/2/3/4/5/600, ½ /1/2/3/4/5/6+                                          |       |        |       |
|      | 20095                                                                                                                  | Size of white wine glass drunk (>1 option)                                                                                                                                        | 1/2/3, 125/175/250ml                                                        |       |        |       |
|      | 100720                                                                                                                 | Fortified wine (includes sherry, port)                                                                                                                                            | 555/1/2/3/4/5/600, ½ /1/2/3/4/5/6+                                          |       |        |       |

---

|  |                                                                                                                                                                                                                               |      |              |            |
|--|-------------------------------------------------------------------------------------------------------------------------------------------------------------------------------------------------------------------------------|------|--------------|------------|
|  | 5 oz servings per day. If multiple glass sizes, derived mean. Missing glass size assumed 175ml (mode). Used mean intake across diet records for each item then summed item means for daily servings. Applied (reverse) points | <1/m | 1/m-<br>1/wk | 2-<br>7/wk |
|--|-------------------------------------------------------------------------------------------------------------------------------------------------------------------------------------------------------------------------------|------|--------------|------------|

Dep: dependent variable (determines whether another question was asked); N: no; Y: yes.

**Supplementary Table S2. AHEI score derivation in UK Biobank.**

| Diet component | UKB variable# | Label                       | Coding (standard servings per day) | Min* | Max |
|----------------|---------------|-----------------------------|------------------------------------|------|-----|
|                |               |                             |                                    | 0    | 10  |
| Vegetables     | 103990        | Veg consumer (dep)          | 0/1, N/Y                           |      |     |
|                | 104160        | Cabbage/kale                | 444/555/1/2/300, ¼ / ½ /1/2/3+     |      |     |
|                | 104240        | Lettuce                     | 444/555/1/2/300, ¼ / ½ /1/2/3+     |      |     |
|                | 104300        | Spinach                     | 444/555/1/2/300, ¼ / ½ /1/2/3+     |      |     |
|                | 104370        | Watercress                  | 444/555/1/2/300, ¼ / ½ /1/2/3+     |      |     |
|                | 104080        | Coleslaw (cabbage)          | 444/555/1/2/300, ¼ / ½ /1/2/3+     |      |     |
|                | 104090        | Side salad                  | 444/555/1/2/300, ¼ / ½ /1/2/3+     |      |     |
|                | 104060        | Mixed veg                   | 444/555/1/2/300, ¼ / ½ /1/2/3+     |      |     |
|                | 104070        | Veg pieces                  | 444/555/1/2/300, ¼ / ½ /1/2/3+     |      |     |
|                | 104120        | Green beans                 | 444/555/1/2/300, ¼ / ½ /1/2/3+     |      |     |
|                | 104130        | Beet root                   | 444/555/1/2/300, ¼ / ½ /1/2/3+     |      |     |
|                | 104140        | Broccoli                    | 444/555/1/2/300, ¼ / ½ /1/2/3+     |      |     |
|                | 104150        | Butternut squash            | 444/555/1/2/300, ¼ / ½ /1/2/3+     |      |     |
|                | 104170        | Carrot                      | 444/555/1/2/300, ¼ / ½ /1/2/3+     |      |     |
|                | 104180        | Cauliflower                 | 444/555/1/2/300, ¼ / ½ /1/2/3+     |      |     |
|                | 104190        | Celery                      | 444/555/1/2/300, ¼ / ½ /1/2/3+     |      |     |
|                | 104200        | Courgetti/zuch              | 444/555/1/2/300, ¼ / ½ /1/2/3+     |      |     |
|                | 104210        | Cucumber                    | 444/555/1/2/300, ¼ / ½ /1/2/3+     |      |     |
|                | 104220        | Garlic                      | 444/555/1/2/300, ¼ / ½ /1/2/3+     |      |     |
|                | 104230        | Leek                        | 444/555/1/2/300, ¼ / ½ /1/2/3+     |      |     |
|                | 104250        | Mushroom                    | 444/555/1/2/300, ¼ / ½ /1/2/3+     |      |     |
|                | 104260        | Onion                       | 444/555/1/2/300, ¼ / ½ /1/2/3+     |      |     |
|                | 104270        | Parsnip                     | 444/555/1/2/300, ¼ / ½ /1/2/3+     |      |     |
|                | 104280        | Pea (frozen, fresh, tinned) | 444/555/1/2/300, ¼ / ½ /1/2/3+     |      |     |
|                | 104290        | Sweet pepper                | 444/555/1/2/300, ¼ / ½ /1/2/3+     |      |     |
|                | 104310        | Sprouts                     | 444/555/1/2/300, ¼ / ½ /1/2/3+     |      |     |
|                | 104320        | Sweetcorn                   | 444/555/1/2/300, ¼ / ½ /1/2/3+     |      |     |
|                | 104330        | Sweet potato                | 444/555/1/2/300, ¼ / ½ /1/2/3+     |      |     |
|                | 104340        | Fresh tomato                | 444/555/1/2/300, ¼ / ½ /1/2/3+     |      |     |
|                | 104350        | Tinned tomato               | 444/555/1/2/300, ¼ / ½ /1/2/3+     |      |     |
|                | 104360        | Turnip/swede                | 444/555/1/2/300, ¼ / ½ /1/2/3+     |      |     |
|                | 104380        | Other veg                   | 444/555/1/2/300, ¼ / ½ /1/2/3+     |      |     |
|                | 102520        | Soup consumer (dep)         | 0/1, N/Y                           |      |     |

|                   |                                                                                                                                                                                                                |                                                                                                                                                                                                                                                                                                                                                                                                |                                                                                                                                                                                                                                                                                                                                                                                                                                                                                                                                                                                                                                  |     |      |
|-------------------|----------------------------------------------------------------------------------------------------------------------------------------------------------------------------------------------------------------|------------------------------------------------------------------------------------------------------------------------------------------------------------------------------------------------------------------------------------------------------------------------------------------------------------------------------------------------------------------------------------------------|----------------------------------------------------------------------------------------------------------------------------------------------------------------------------------------------------------------------------------------------------------------------------------------------------------------------------------------------------------------------------------------------------------------------------------------------------------------------------------------------------------------------------------------------------------------------------------------------------------------------------------|-----|------|
|                   | 102540<br>102620<br>20108<br>20109<br><br>103310<br>20088                                                                                                                                                      | Canned (dep)<br>Homemade (dep)<br>Ingredients in canned soup<br>Ingredients in homemade soup<br><br>Spreads/sauces consumers (dep)<br>Types of spreads/sauces consumed<br>Tomato sauce<br><br>*1veg soup= 0.25 veg serving                                                                                                                                                                     | 555/1/2/3/400, ½ /1/2/3/4+<br>555/1/2/3/400, ½ /1/2/3/4+<br>5, vegetables<br>5, vegetables<br><br>0/1, N/Y<br><br>346 (max 1 serving)                                                                                                                                                                                                                                                                                                                                                                                                                                                                                            |     |      |
|                   | Used mean intake across diet records for each item then summed item means for daily servings.<br>Applied points                                                                                                |                                                                                                                                                                                                                                                                                                                                                                                                |                                                                                                                                                                                                                                                                                                                                                                                                                                                                                                                                                                                                                                  | 0/d | ≥5/d |
| Fruit (not juice) | 104400<br>104410<br>104420<br>104430<br>104440<br>104450<br>104460<br>104470<br>104480<br>104490<br>104500<br>104510<br>104520<br>104530<br>104540<br>104550<br>104560<br>104570<br>104580<br>104590<br>104100 | Fruit consumer (dep)<br>Stewed fruit intake<br>Prune intake<br>Dried fruit intake<br>Mixed fruit intake<br>Apple intake<br>Banana intake<br>Berry intake<br>Cherry intake<br>Grapefruit intake<br>Grape intake<br>Mango intake<br>Melon intake<br>Orange intake<br>Satsuma intake<br>Peach/nectarine intake<br>Pear intake<br>Pineapple intake<br>Plum intake<br>Other fruit intake<br>Avocado | 0/1, N/Y<br>555/1/2/3/400, ½ /1/2/3/4+<br>555/1/2/3/400, ½ /1/2/3/4+ |     |      |
|                   | Used mean intake across diet records for each item then summed item means for daily servings.<br>Applied points                                                                                                |                                                                                                                                                                                                                                                                                                                                                                                                |                                                                                                                                                                                                                                                                                                                                                                                                                                                                                                                                                                                                                                  | 0/d | ≥4/d |
| Whole grains      | 26076<br>26077                                                                                                                                                                                                 | Bran cereal<br>Oat cereal (non sugar)                                                                                                                                                                                                                                                                                                                                                          | g/d<br>g/d                                                                                                                                                                                                                                                                                                                                                                                                                                                                                                                                                                                                                       |     |      |

|                                         |                                                                                                                                                                                                                             |                                                                                                                                                                                                                                                                                                                                                                                                                       |                                                                                                                                                                                                                                                                                                                          |      |                          |
|-----------------------------------------|-----------------------------------------------------------------------------------------------------------------------------------------------------------------------------------------------------------------------------|-----------------------------------------------------------------------------------------------------------------------------------------------------------------------------------------------------------------------------------------------------------------------------------------------------------------------------------------------------------------------------------------------------------------------|--------------------------------------------------------------------------------------------------------------------------------------------------------------------------------------------------------------------------------------------------------------------------------------------------------------------------|------|--------------------------|
| (modified per Wang et al 2014)          | 26074<br>26114<br>26105                                                                                                                                                                                                     | Wholemeal bread<br>Wholemeal pasta, brown rice and other wholegrains<br>Muesli (1/2 serving)                                                                                                                                                                                                                                                                                                                          | g/d<br>g/d<br>g/d<br>g/d                                                                                                                                                                                                                                                                                                 |      |                          |
|                                         | Used derived food weight variables available to UKB researchers to determine total g of wholegrain foods; not whole grain g per se. Assumed whole grains contributed half the weight of Muesli (fruit/nuts the other half). |                                                                                                                                                                                                                                                                                                                                                                                                                       |                                                                                                                                                                                                                                                                                                                          | 0/d  | 75 g/d (F)<br>90 g/d (M) |
| Sugar sweetened beverages + fruit juice | 100530<br>100550<br>100170<br>100180<br>100190<br>100200<br>100220<br>100210                                                                                                                                                | Flavored milk intake<br>Hot chocolate intake<br>Fizzy drink intake<br>Squash intake<br>Orange juice intake<br>Grapefruit juice intake<br>Fruit smoothie intake<br>Pure fruit/vegetable juice intake (1 serving=1/2 fruit juice serving)                                                                                                                                                                               | 555/1/2/3/4/5/600, ½ /1/2/3/4/5/6+<br>555/1/2/3/4/5/600, ½ /1/2/3/4/5/6+             |      |                          |
|                                         | Used mean intake across diet records for each item then summed item means for daily intake. Applied (reverse) points.                                                                                                       |                                                                                                                                                                                                                                                                                                                                                                                                                       |                                                                                                                                                                                                                                                                                                                          | ≥1/d | 0                        |
| Nuts & Legumes                          | 103990<br>104000<br>104010<br>104110<br><br>102520<br>102540<br>102620<br>20108<br>20109<br><br>103310<br>20088<br><br>103250<br>103270                                                                                     | Vegetable consumers (dep)<br>Baked bean<br>Pulses<br>Broad bean<br><br>Soup consumer (dep)<br>Canned (dep)<br>Homemade (dep)<br>Ingredients in canned soup (>1 option)<br>Ingredients in homemade soup (>1 option)<br>*1 bean soup= 0.25 bean serving<br><br>Spreads/sauces consumers (dep)<br>Types of spreads/sauces consumed<br>Hummus<br>Peanut butter<br><br>Vegetarian alternatives intake (dep)<br>Tofu intake | 0/1, N/Y<br>444/555/1/2/300, ¼ / ½ /1/2/3+<br>444/555/1/2/300, ¼ / ½ /1/2/3+<br>444/555/1/2/300, ¼ / ½ /1/2/3+<br><br>0/1, N/Y<br>555/1/2/3/400, ½ /1/2/3/4+<br>555/1/2/3/400, ½ /1/2/3/4+<br>4, pulses<br>4, pulses<br><br>0/1, N/Y<br><br>336<br>334 (assumed 1 serving)<br><br>0/1, N/Y<br>555/1/2/3/400, ½ /1/2/3/4+ |      |                          |

|                                        |                                                                                                                                                                                                                                     |                                                                                                            |                                                                                                                                                                                                                      |                |               |
|----------------------------------------|-------------------------------------------------------------------------------------------------------------------------------------------------------------------------------------------------------------------------------------|------------------------------------------------------------------------------------------------------------|----------------------------------------------------------------------------------------------------------------------------------------------------------------------------------------------------------------------|----------------|---------------|
|                                        | 102400<br>102430<br>102410<br>102450<br>102440<br>102420                                                                                                                                                                            | Savory snack consumer (dep)<br>Salted nuts<br>Salted peanuts<br>Seeds<br>Unsalted nuts<br>Unsalted peanuts | 0/1, N/Y<br>555/1/2/300, ½ /1/2/3+<br>555/1/2/300, ½ /1/2/3+<br>555/1/2/300, ½ /1/2/3+<br>555/1/2/300, ½ /1/2/3+<br>555/1/2/300, ½ /1/2/3+                                                                           |                |               |
|                                        | Used mean intake across diet records for each item then summed item means for daily servings.<br>Applied points                                                                                                                     |                                                                                                            |                                                                                                                                                                                                                      | 0/d            | ≥1/d          |
| Red meat & products                    | 103000<br>103010<br>103020<br>103030<br>103040<br>103070<br>103080                                                                                                                                                                  | Meat consumers (dep)<br>Sausage<br>Beef<br>Pork<br>Lamb<br>Bacon<br>Ham                                    | 0/1, N/Y<br>555/1/2/3/4/500, ½ /1/2/3/4/5+<br>555/1/2/3/4/500, ½ /1/2/3/4/5+<br>555/1/2/3/4/500, ½ /1/2/3/4/5+<br>555/1/2/3/4/500, ½ /1/2/3/4/5+<br>555/1/2/3/4/500, ½ /1/2/3/4/5+<br>555/1/2/3/4/500, ½ /1/2/3/4/5+ |                |               |
|                                        | Used mean intake across diet records for each item then summed item means for daily servings.<br>Applied (reverse) points                                                                                                           |                                                                                                            |                                                                                                                                                                                                                      | ≥1.5/d         | 0             |
| Trans fat, %energy                     | 26155<br>26002                                                                                                                                                                                                                      | Trans fatty acids<br>Energy, kj                                                                            | g/d<br>kj/d                                                                                                                                                                                                          |                |               |
|                                        | Converted trans g to calories and derived % of total energy (cal=kj*0.2388458966275 ). Used mean intake across diet records. Applied (reverse) points.                                                                              |                                                                                                            |                                                                                                                                                                                                                      | ≥4             | ≤0.5          |
| Long chain (n-3) fats (EPA +DHA), mg/d | 103140<br>103160                                                                                                                                                                                                                    | Fish consumer (dep)<br>Oily fish                                                                           | 0/1, N/Y<br>555/1/2/3/400, ½ /1/2/3/4+                                                                                                                                                                               |                |               |
|                                        | The cutoff for optimal intake per ref (250 mg/d) is ~2 4-oz servings of fish /wk. Per Perez et al, a serving of fish was assumed 100g (3.6 oz). We applied the cutoff for optimal intake as 2 servings per week.                    |                                                                                                            |                                                                                                                                                                                                                      | 0              | ≥2/wk         |
| PUFA, % energy                         | 26015<br>26016<br>26002                                                                                                                                                                                                             | n-3 fatty acids<br>n-6 fatty acids<br>Energy, kj                                                           | g/d<br>g/d<br>kj/d                                                                                                                                                                                                   |                |               |
|                                        | Summed n-3 and n-6 and converted g to calories and derived % of total energy (cal=kj*0.2388458966275 ). Used mean intake across diet records. This component includes EPA + DHA but contributes minimally to score. Applied points. |                                                                                                            |                                                                                                                                                                                                                      | ≤2             | ≥10           |
| Sodium, mg/d                           | 26052                                                                                                                                                                                                                               | Sodium                                                                                                     | mg/d                                                                                                                                                                                                                 |                |               |
|                                        | Used mean derived nutrient intake across diet records.                                                                                                                                                                              |                                                                                                            |                                                                                                                                                                                                                      | Highest decile | Lowest decile |
| Alcohol, drinks/d                      | 26067                                                                                                                                                                                                                               | Beer and cider                                                                                             | g/d                                                                                                                                                                                                                  | ≥2.5 (F)       | 0.5-1.5 (F)   |

---

|  |                                                                                                                                                  |                |     |          |             |
|--|--------------------------------------------------------------------------------------------------------------------------------------------------|----------------|-----|----------|-------------|
|  | 26151                                                                                                                                            | Fortified wine | g/d | ≥3.5 (F) | 0.5-2.0 (M) |
|  | 26152                                                                                                                                            | Red wine       | g/d |          |             |
|  | 26153                                                                                                                                            | White wine     | g/d |          |             |
|  | 26138                                                                                                                                            | Spirits        | g/d |          |             |
|  | Used derived food weight variables available to UKB researchers. One drink is 4 oz of wine, 12 oz of beer, or 1.5 oz of spirits (1 oz = 28.35 g) |                |     |          |             |

\*A score of 10 indicates that the recommendations were fully met, whereas a score of 0 represents the least healthy dietary behavior. Intermediate intakes were scored proportionately between 0 and 10. EPA: eicosapentaenoic acid; DHA: docosahexaenoic acid; PUFA: polyunsaturated fatty acids; F: female; M: male; dep: dependent variable (determines whether another question was asked); N: no; Y: yes.

**Supplementary Table S3. MIND components in UK Biobank.**

| Component               | Score | <i>n</i> | %    | <i>n</i> | %    | <i>n</i> | %    |
|-------------------------|-------|----------|------|----------|------|----------|------|
| Green leafy vegetables  | 0     | 27,940   | 69.4 | 17,618   | 49.0 | 13,067   | 29.4 |
|                         | 0.5   | 10,313   | 25.6 | 13,843   | 38.5 | 18,680   | 42.0 |
|                         | 1     | 2003     | 5.0  | 4502     | 12.5 | 12,695   | 28.6 |
| Other vegetables        | 0     | 11,113   | 27.6 | 3259     | 9.1  | 1198     | 2.7  |
|                         | 0.5   | 3454     | 8.6  | 2153     | 6.0  | 1293     | 2.9  |
|                         | 1     | 25,689   | 63.8 | 30,551   | 85.0 | 41,951   | 94.4 |
| Berries                 | 0     | 34,463   | 85.6 | 24,976   | 69.5 | 20,226   | 45.5 |
|                         | 0.5   | 2350     | 5.8  | 34,93    | 9.7  | 5248     | 11.8 |
|                         | 1     | 3443     | 8.6  | 74,94    | 20.8 | 18,968   | 42.7 |
| Nuts                    | 0     | 32,369   | 80.4 | 24,217   | 67.3 | 22,475   | 50.6 |
|                         | 0.5   | 6093     | 15.1 | 8575     | 23.8 | 13,637   | 30.7 |
|                         | 1     | 1794     | 4.5  | 3171     | 8.8  | 8330     | 18.7 |
| Olive oil               | 0     | 38,358   | 95.3 | 31,674   | 88.1 | 32,168   | 72.4 |
|                         | 1     | 1898     | 4.7  | 4289     | 11.9 | 12,274   | 27.6 |
| Butter/margarine        | 0     | 13,578   | 33.7 | 8207     | 22.8 | 5985     | 13.5 |
|                         | 0.5   | 16,766   | 41.7 | 14,545   | 40.4 | 15,397   | 34.7 |
|                         | 1     | 9912     | 24.6 | 13,211   | 36.7 | 23,060   | 51.9 |
| Cheese<br>(not low fat) | 0     | 6827     | 17.0 | 4507     | 12.5 | 4126     | 9.3  |
|                         | 0.5   | 21,118   | 52.5 | 19,056   | 53.0 | 22,572   | 50.8 |
|                         | 1     | 12,311   | 30.6 | 12,400   | 34.5 | 17,744   | 39.9 |
| Whole grains            | 0     | 19,104   | 47.5 | 11,681   | 32.5 | 9543     | 21.5 |
|                         | 0.5   | 14,067   | 34.9 | 14,796   | 41.1 | 18,858   | 42.4 |
|                         | 1     | 7085     | 17.6 | 9486     | 26.4 | 16,041   | 36.1 |
| Fish (not fried)        | 0     | 28,409   | 70.6 | 16,582   | 46.1 | 11,620   | 26.2 |
|                         | 0.5   | 613      | 1.5  | 714      | 2.0  | 649      | 1.5  |
|                         | 1     | 11,234   | 27.9 | 18,667   | 51.9 | 32,173   | 72.4 |
| Beans                   | 0     | 30,111   | 74.8 | 22,486   | 62.5 | 20,888   | 47.0 |
|                         | 0.5   | 6211     | 15.4 | 7474     | 20.8 | 10,449   | 23.5 |
|                         | 1     | 3934     | 9.8  | 6003     | 16.7 | 13,105   | 29.5 |
| Poultry (not fried)     | 0     | 26,728   | 66.4 | 18,144   | 50.5 | 17,308   | 39.0 |
|                         | 0.5   | 4456     | 11.1 | 4640     | 12.9 | 5616     | 12.6 |
|                         | 1     | 9072     | 22.5 | 13,179   | 36.7 | 21,518   | 48.4 |
| Red meat & products     | 0     | 25,479   | 63.3 | 14,853   | 41.3 | 9977     | 22.5 |
|                         | 0.5   | 4161     | 10.3 | 5042     | 14.0 | 5517     | 12.4 |
|                         | 1     | 10,616   | 26.4 | 16,068   | 44.7 | 28,948   | 65.1 |
| Fast/fried foods        | 0     | 25,089   | 62.3 | 14,590   | 40.6 | 9532     | 21.5 |
|                         | 0.5   | 6857     | 17.0 | 8448     | 23.5 | 10,081   | 22.7 |
|                         | 1     | 8310     | 20.6 | 12,925   | 35.9 | 24,829   | 55.9 |
| Pastries and sweets     | 0     | 37,942   | 94.3 | 31,799   | 88.4 | 33,458   | 75.3 |
|                         | 0.5   | 820      | 2.0  | 1312     | 3.7  | 2785     | 6.3  |
|                         | 1     | 1494     | 3.7  | 2852     | 7.9  | 8199     | 18.5 |
| Wine                    | 0     | 34,949   | 86.8 | 26,778   | 74.5 | 26,930   | 60.6 |
|                         | 0.5   | 250      | 0.6  | 358      | 1.0  | 549      | 1.2  |
|                         | 1     | 5057     | 12.6 | 8827     | 24.5 | 16,963   | 38.2 |

**Supplementary Table S4. Baseline characteristics of participants 55+ years of age by tertiles (T) of MIND and AHEI-2010 score<sup>1</sup>**

| Characteristic                                     | MIND                         |                              |                               | AHEI-2010                      |                                |                                 |
|----------------------------------------------------|------------------------------|------------------------------|-------------------------------|--------------------------------|--------------------------------|---------------------------------|
|                                                    | T1                           | T2                           | T3                            | T1                             | T2                             | T3                              |
|                                                    | 0.0–5.5<br><i>n</i> = 24,887 | 5.5–7.0<br><i>n</i> = 30,700 | 7.5–14.5<br><i>n</i> = 23,076 | 12.2–51.0<br><i>n</i> = 26,221 | 51.0–63.2<br><i>n</i> = 26,221 | 63.2–107.1<br><i>n</i> = 26,221 |
| Age, years                                         | 62.7±4.4                     | 62.8±4.3                     | 62.6±4.3                      | 62.6±4.4                       | 62.8±4.3                       | 62.8±4.3                        |
| Female, <i>n</i> (%)                               | 9977 (40.1)                  | 16,909 (55.1)                | 15,672 (67.9)                 | 10,855 (41.4)                  | 14,465 (55.2)                  | 17,238 (65.7)                   |
| Race/ethnicity, <i>n</i> (%)                       |                              |                              |                               |                                |                                |                                 |
| White                                              | 24,495 (98.4)                | 30,055 (97.9)                | 22,404 (97.1)                 | 25,807 (98.4)                  | 25,685 (98.0)                  | 25,462 (97.1)                   |
| South Asian                                        | 95 (0.4)                     | 191 (0.6)                    | 191 (0.8)                     | 90 (0.3)                       | 153 (0.6)                      | 234 (0.9)                       |
| Black                                              | 47 (0.2)                     | 100 (0.3)                    | 113 (0.5)                     | 61 (0.2)                       | 68 (0.3)                       | 131 (0.5)                       |
| Chinese                                            | 27 (0.1)                     | 52 (0.2)                     | 64 (0.3)                      | 29 (0.1)                       | 40 (0.2)                       | 74 (0.3)                        |
| Other, Unknown                                     | 223 (0.90)                   | 302 (1.0)                    | 304 (1.3)                     | 234 (0.9)                      | 275 (1.0)                      | 320 (1.2)                       |
| Townsend                                           | −1.84±2.75                   | −1.92±2.70                   | −1.80±2.74                    | −1.84±2.74                     | −1.90±2.70                     | −1.84±2.73                      |
| Household income 52000+, <i>n</i> (%)              | 5088 (20.4)                  | 7126 (23.2)                  | 6027 (26.1)                   | 6188 (23.6)                    | 5906 (22.5)                    | 6147 (23.4)                     |
| College/university degree, <i>n</i> (%)            | 9253 (37.2)                  | 13,563 (44.2)                | 11,931 (51.7)                 | 10410 (39.7)                   | 11456 (43.7)                   | 12881 (49.1)                    |
| Currently employed, <i>n</i> (%)                   | 11,494 (46.2)                | 13,862 (45.2)                | 10,720 (46.5)                 | 12,255 (46.7)                  | 11,789 (45.0)                  | 12032 (45.9)                    |
| Current smoker, <i>n</i> (%)                       | 2130 (8.6)                   | 1712 (5.6)                   | 898 (3.9)                     | 2311 (8.8)                     | 1495 (5.7)                     | 934 (3.6)                       |
| BMI, kg/m <sup>2</sup>                             | 27.6±4.6                     | 26.8±4.4                     | 26.1±4.3                      | 27.7±4.6                       | 26.9±4.4                       | 25.9±4.2                        |
| Moderate to vigorous physical activity, hours/week | 70.4±88.4                    | 73.1±82.7                    | 77.1±81.8                     | 68.9±85.3                      | 73.4±83.9                      | 78.0±83.7                       |
| Self-reported health, <i>n</i> (%)                 |                              |                              |                               |                                |                                |                                 |
| Excellent                                          | 4280 (17.2)                  | 6505 (21.2)                  | 5574 (24.2)                   | 4664 (17.9)                    | 5441 (20.8)                    | 6254 (23.9)                     |
| Good                                               | 14,908 (60.0)                | 18,784 (61.3)                | 14,131 (61.3)                 | 15743 (60.1)                   | 16009 (61.2)                   | 16071 (61.4)                    |
| Fair                                               | 4806 (19.4)                  | 4669 (15.2)                  | 2925 (12.7)                   | 4879 (18.6)                    | 4120 (15.7)                    | 3401 (13.0)                     |
| Poor                                               | 849 (3.4)                    | 683 (2.2)                    | 406 (1.8)                     | 891 (3.4)                      | 604 (2.3)                      | 443 (1.7)                       |
| Family history of dementia, <i>n</i> (%)           | 592 (2.4)                    | 817 (2.7)                    | 636 (2.8)                     | 644 (2.5)                      | 705 (2.7)                      | 696 (2.7)                       |
| Diabetes, <i>n</i> (%)                             | 1004 (4.0)                   | 931 (3.0)                    | 519 (2.3)                     | 949 (3.6)                      | 834 (3.2)                      | 671 (2.6)                       |
| Heart disease, <i>n</i> (%)                        | 1602 (6.4)                   | 1575 (5.1)                   | 939 (4.1)                     | 1625 (6.2)                     | 1362 (5.2)                     | 1129 (4.3)                      |
| Hypertension, <i>n</i> (%)                         | 5592 (22.5)                  | 6244 (20.3)                  | 3986 (17.3)                   | 5956 (22.7)                    | 5275 (20.1)                    | 4591 (17.5)                     |
| Stroke, <i>n</i> (%)                               | 396 (1.6)                    | 401 (1.3)                    | 238 (1.0)                     | 429 (1.6)                      | 333 (1.3)                      | 273 (1.0)                       |
| Depression, <i>n</i> (%)                           | 1056 (4.2)                   | 1123 (3.7)                   | 870 (3.8)                     | 1048 (4.0)                     | 985 (3.8)                      | 1016 (3.9)                      |
| Apoe ε4 carriers, <i>n</i> (%) <sup>2</sup>        | 5676 (27.2)                  | 7248 (27.9)                  | 5412 (27.6)                   | 5886 (26.7)                    | 6129 (27.7)                    | 6321 (28.5)                     |
| GS <sub>AD</sub> <sup>2</sup>                      | 26.9±3.0                     | 26.9±3.1                     | 26.9±3.1                      | 26.9±3.1                       | 26.9±3.0                       | 26.8±3.1                        |
| Energy, calories/d                                 | 2077±434                     | 2001±423                     | 1944±421                      | 2090±436                       | 1988±425                       | 1947±413                        |
| Frequent fast meal consumer, %                     | 759 (3.1)                    | 619 (2.0)                    | 345 (1.5)                     | 824 (3.1)                      | 541 (2.1)                      | 358 (1.4)                       |

---

|                                    |               |               |               |                 |                 |                 |
|------------------------------------|---------------|---------------|---------------|-----------------|-----------------|-----------------|
| Vitamin/mineral supplement user, % | 11,239 (45.2) | 15,865 (51.7) | 13,371 (57.9) | 11937<br>(45.5) | 13466<br>(51.4) | 15072<br>(57.5) |
|------------------------------------|---------------|---------------|---------------|-----------------|-----------------|-----------------|

<sup>1</sup>Values are mean±SD or *n* (%). Age at the time of first Oxford WebQ. Non-diet data collected at baseline assessment center visit or linked hospital records. <sup>2</sup>*n* = 20899, 25941, 19582 for MIND T1, T2 and T3, respectively. *n* = 22057, 22153, 22212 for AHEI T1, T2 and T3, respectively

---

**Supplementary Table S5. AHEI-2010 components in UK Biobank.**

| <b>Components</b>                         | <b>Mean Score</b> | <b>SD</b> |
|-------------------------------------------|-------------------|-----------|
| Vegetables                                | 5.1               | 2.9       |
| Fruit (not juice)                         | 5.2               | 3.1       |
| Whole grains                              | 5.9               | 4.1       |
| Sugar sweetened beverages + fruit juice   | 4.8               | 4.0       |
| Nuts & Legumes                            | 3.4               | 3.5       |
| Red meat & products                       | 5.2               | 3.6       |
| Trans fat                                 | 9.8               | 0.4       |
| Long chain ( <i>n</i> -3) fats (EPA +DHA) | 2.6               | 4.2       |
| PUFA                                      | 4.5               | 1.9       |
| Sodium                                    | 5.0               | 3.2       |
| Alcohol                                   | 4.9               | 3.6       |
| Total                                     | 62.7              | 12.5      |

**Supplementary Table S6 Associations between adherence to MIND and cognitive ability with and without adjustment for education and income level.**

|                                        |       | Test Score <sup>3</sup> | Model 1 plus education & income <sup>1</sup> |          | Model 2 without education & income <sup>2</sup> |          |
|----------------------------------------|-------|-------------------------|----------------------------------------------|----------|-------------------------------------------------|----------|
| <i>n</i>                               |       |                         | β (95% CI)                                   | <i>P</i> | β (95% CI)                                      | <i>P</i> |
| <sup>4</sup> Fluid Intelligence        |       |                         |                                              |          |                                                 |          |
| MIND T1                                | 18764 | 6.69 (2.07)             | Reference                                    |          | Reference                                       |          |
| MIND T2                                | 16865 | 6.73 (2.05)             | −0.04 (−0.08, −0.001)                        | 0.04     | 0.09 (0.05, 0.13)                               | <0.0001  |
| MIND T3                                | 21003 | 6.69 (2.02)             | −0.16 (−0.20, −0.12)                         | <0.0001  | 0.10 (0.06, 0.14)                               | <0.0001  |
| MIND score (raw), linear trend         |       |                         | −0.04 (−0.05, −0.03)                         | <0.0001  | 0.02 (0.01, 0.03)                               | <0.0001  |
| <sup>5</sup> Reaction Time             |       |                         |                                              |          |                                                 |          |
| MIND T1                                | 40084 | 542 (101)               | Reference                                    |          | Reference                                       |          |
| MIND T2                                | 35807 | 544 (99)                | −0.94 (−2.32, 0.43)                          | 0.18     | −1.44 (−2.82, −0.06)                            | 0.04     |
| MIND T3                                | 44224 | 548 (101)               | 0.18 (−1.17, 1.52)                           | 0.80     | −1.31 (−2.66, 0.03)                             | 0.06     |
| MIND score (raw), linear trend         |       |                         | 0.21 (−0.09, 0.50)                           | 0.17     | −0.16 (−0.45, 0.13)                             | 0.29     |
| <sup>5</sup> Pairs Matching            |       |                         |                                              |          |                                                 |          |
| MIND T1                                | 39941 | 1.38 (0.62)             | Reference                                    |          | Reference                                       |          |
| MIND T2                                | 35609 | 1.39 (0.62)             | 0.01 (0.004, 0.02)                           | 0.004    | 0.005 (−0.003, 0.01)                            | 0.23     |
| MIND T3                                | 43999 | 1.42 (0.62)             | 0.04 (0.03, 0.04)                            | <0.0001  | 0.02 (0.01, 0.03)                               | <0.0001  |
| MIND score (raw), linear trend         |       |                         | 0.01 (0.008, 0.01)                           | <0.0001  | 0.006 (0.004, 0.008)                            | <0.0001  |
| <sup>4</sup> Symbol Digit Substitution |       |                         |                                              |          |                                                 |          |
| MIND T1                                | 23075 | 20.2 (5.1)              | Reference                                    |          | Reference                                       |          |
| MIND T2                                | 21153 | 20.1 (5.1)              | −0.04 (−0.12, 0.05)                          | 0.37     | 0.04 (−0.04, 0.13)                              | 0.35     |
| MIND T3                                | 26404 | 19.9 (5.0)              | −0.23 (−0.32, −0.15)                         | <0.0001  | −0.02 (−0.10, 0.06)                             | 0.63     |
| MIND score (raw), linear trend         |       |                         | −0.07 (−0.09, −0.05)                         | <0.0001  | −0.02 (−0.03, 0.002)                            | 0.08     |
| <sup>5</sup> Trail A                   |       |                         |                                              |          |                                                 |          |
| MIND T1                                | 20603 | 3.58 (0.32)             | Reference                                    |          | Reference                                       |          |
| MIND T2                                | 18780 | 3.59 (0.32)             | 0.004 (−0.002, 0.01)                         | 0.15     | −0.0005 (−0.006, 0.005)                         | 0.87     |
| MIND T3                                | 23258 | 3.60 (0.31)             | 0.01 (0.007, 0.02)                           | <0.0001  | 0.001 (−0.005, 0.007)                           | 0.71     |
| MIND score (raw), linear trend         |       |                         | 0.003 (0.002, 0.004)                         | <0.0001  | −0.00003 (−0.001, 0.001)                        | 0.96     |
| <sup>5</sup> Trail B                   |       |                         |                                              |          |                                                 |          |
| MIND T1                                | 20603 | 4.10 (0.33)             | Reference                                    |          | Reference                                       |          |
| MIND T2                                | 18780 | 4.12 (0.33)             | 0.009 (0.004, 0.02)                          | 0.002    | 0.002 (−0.004, 0.008)                           | 0.54     |
| MIND T3                                | 23257 | 4.13 (0.33)             | 0.02 (0.02, 0.03)                            | <0.0001  | 0.004 (−0.002, 0.01)                            | 0.16     |
| MIND score (raw), linear trend         |       |                         | 0.006 (0.005, 0.007)                         | <0.0001  | 0.001 (0.0002, 0.003)                           | 0.03     |
| <sup>4</sup> Prospective Memory Test   |       |                         |                                              |          |                                                 |          |
| <i>n</i>                               |       | % correct               | OR (95% CI)                                  | <i>P</i> | OR (95% CI)                                     | <i>P</i> |
| MIND T1                                | 18887 | 86                      | Reference                                    |          | Reference                                       |          |
| MIND T2                                | 16978 | 86                      | 1.00 (0.94, 1.07)                            | 0.94     | 1.05 (0.99, 1.12)                               | 0.12     |
| MIND T3                                | 21132 | 85                      | 0.94 (0.88, 0.99)                            | 0.03     | 1.04 (0.98, 1.10)                               | 0.26     |
| MIND score (raw), linear trend         |       |                         | 0.98 (0.96, 0.99)                            | 0.004    | 1.00 (0.99, 1.01)                               | 0.85     |

<sup>1</sup>Model 1: adjusted for age, sex and self-reported race/ethnicity; <sup>2</sup>Model 2: adjusted for age, sex, race/ethnicity, [education, income], Townsend deprivation index, employment status, global cognition score, family history of dementia; history of hypertension, diabetes, heart disease, stroke and depression; self-reported health, smoking, physical activity, BMI, fast meal consumption and energy intake. <sup>3</sup>Data are raw mean (SD) scores of each cognitive function test. <sup>4</sup>Positive beta-coefficients for FI (difference in 13-point score) and SDS (difference in number of correct substitutions) and OR >1 for PM (correct on first attempt) correspond to higher performance compared to MIND tertile 1. <sup>5</sup>Negative beta-coefficients for Pairs (difference in (log-transformed) number of errors), RT (difference in time, seconds, to respond), Trails A and Trails B (difference in (log transformed) time to complete) correspond to higher performance compared to MIND tertile 1.

**Supplementary Table S7 Associations between adherence to MIND and cognitive ability among participants aged 55+ years.**

| <i>n</i> Test Score <sup>3</sup>       |          |             | Model 1 <sup>1</sup>    |          | Model 2 <sup>2</sup>  |          |
|----------------------------------------|----------|-------------|-------------------------|----------|-----------------------|----------|
|                                        |          |             | β (95% CI)              | <i>P</i> | β (95% CI)            | <i>P</i> |
| <sup>4</sup> Fluid Intelligence        |          |             |                         |          |                       |          |
| MIND T1                                | 11141    | 6.68 (2.06) | Reference               |          | Reference             |          |
| MIND T2                                | 13915    | 6.70 (2.01) | 0.10 (0.05, 0.15)       | 0.0001   | −0.05 (−0.10, −0.007) | 0.02     |
| MIND T3                                | 10697    | 6.66 (1.98) | 0.10 (0.05, 0.16)       | 0.0001   | −0.17 (−0.22, −0.12)  | <0.0001  |
| MIND score (raw), linear trend         |          |             | 0.02 (0.01, 0.03)       | 0.0001   | −0.04 (−0.05, −0.03)  | <0.0001  |
| MIND score (per SD), linear trend      |          |             | 0.04 (0.02, 0.06)       |          | −0.08 (−0.10, −0.06)  |          |
| <sup>5</sup> Reaction Time             |          |             |                         |          |                       |          |
| MIND T1                                | 24762    | 567 (103)   | Reference               |          | Reference             |          |
| MIND T2                                | 30552    | 562 (101)   | −2.75 (−4.46, −1.05)    | 0.002    | −0.87 (−2.58, 0.84)   | 0.32     |
| MIND T3                                | 22957    | 566 (104)   | −2.12 (−3.97, −0.27)    | 0.03     | 1.14 (−0.75, 3.04)    | 0.24     |
| MIND score (raw), linear trend         |          |             | −0.48 (−0.86, −0.10)    | 0.01     | 0.27 (−0.12, 0.66)    | 0.17     |
| MIND score (per SD), linear trend      |          |             | −0.92 (−1.65, −0.19)    |          | 0.52 (−0.22, 1.27)    |          |
| <sup>5</sup> Pairs Matching            |          |             |                         |          |                       |          |
| MIND T1                                | 24626    | 1.44 (0.62) | Reference               |          | Reference             |          |
| MIND T2                                | 30340    | 1.45 (0.62) | 0.01 (0.0007, 0.02)     | 0.04     | 0.01 (0.004, 0.03)    | 0.007    |
| MIND T3                                | 22787    | 1.46 (0.62) | 0.02 (0.01, 0.04)       | <0.0001  | 0.03 (0.02, 0.04)     | <0.0001  |
| MIND score (raw), linear trend         |          |             | 0.006 (0.004, 0.008)    | <0.0001  | 0.007 (0.005, 0.01)   | <0.0001  |
| MIND score (per SD), linear trend      |          |             | 0.01 (0.007, 0.02)      |          | 0.01 (0.009, 0.02)    |          |
| <sup>4</sup> Symbol Digit Substitution |          |             |                         |          |                       |          |
| MIND T1                                | 14474    | 18.8 (4.8)  | Reference               |          | Reference             |          |
| MIND T2                                | 18381    | 18.8 (4.8)  | 0.08 (−0.02, 0.18)      | 0.13     | −0.11 (−0.21, −0.01)  | 0.03     |
| MIND T3                                | 13769    | 18.7 (4.8)  | 0.03 (−0.07, 0.14)      | 0.54     | −0.28 (−0.39, −0.17)  | <0.0001  |
| MIND score (raw), linear trend         |          |             | 0.005 (−0.02, 0.03)     | 0.67     | −0.07 (−0.09, −0.05)  | <0.0001  |
| MIND score (per SD), linear trend      |          |             | 0.009 (−0.03, 0.05)     |          | −0.13 (−0.17, −0.09)  |          |
| <sup>5</sup> Trail A                   |          |             |                         |          |                       |          |
| MIND T1                                | 12757    | 3.64 (0.31) | Reference               |          | Reference             |          |
| MIND T2                                | 16078    | 3.65 (0.31) | −0.0006 (−0.008, 0.006) | 0.86     | 0.007 (0.0002, 0.01)  | 0.04     |
| MIND T3                                | 11954    | 3.65 (0.30) | −0.005 (−0.01, 0.003)   | 0.21     | 0.009 (0.001, 0.02)   | 0.03     |
| MIND score (raw), linear trend         |          |             | −0.001 (−0.003, 0.0005) | 0.16     | 0.002 (0.0005, 0.004) | 0.01     |
| MIND score (per SD), linear trend      |          |             | −0.002 (−0.005, 0.0009) |          | 0.004 (0.0009, 0.007) |          |
| <sup>5</sup> Trail B                   |          |             |                         |          |                       |          |
| MIND T1                                | 12757    | 4.19 (0.33) | Reference               |          | Reference             |          |
| MIND T2                                | 16078    | 4.19 (0.32) | −0.005 (−0.01, 0.002)   | 0.17     | 0.01 (0.003, 0.02)    | 0.004    |
| MIND T3                                | 11953    | 4.20 (0.32) | −0.003 (−0.01, 0.005)   | 0.41     | 0.02 (0.02, 0.03)     | <0.0001  |
| MIND score (raw), linear trend         |          |             | −0.0007 (−0.002, 0.001) | 0.42     | 0.006 (0.004, 0.007)  | <0.0001  |
| MIND score (per SD), linear trend      |          |             | −0.001 (−0.004, 0.002)  |          | 0.01 (0.008, 0.01)    |          |
| <sup>4</sup> Prospective Memory Test   |          |             |                         |          |                       |          |
|                                        | <i>n</i> | % correct   | OR (95% CI)             | <i>P</i> | OR (95% CI)           | <i>P</i> |
| MIND T1                                | 11234    | 83.7        | Reference               |          | Reference             |          |
| MIND T2                                | 11827    | 84.3        | 1.10 (1.03, 1.18)       | 0.008    | 1.05 (0.98, 1.12)     | 0.20     |
| MIND T3                                | 10771    | 83.4        | 1.06 (0.98, 1.14)       | 0.15     | 0.96 (0.89, 1.04)     | 0.35     |
| MIND score (raw), linear trend         |          |             | 1.01 (0.99, 1.03)       | 0.24     | 0.99 (0.97, 1.00)     | 0.15     |
| MIND score (per SD), linear trend      |          |             | 1.02 (0.99, 1.05)       |          | 0.98 (0.95, 1.01)     |          |

<sup>1</sup>Model 1: adjusted for age, sex and self-reported race. <sup>2</sup>Model 2: adjusted for age, sex, race, smoking, Townsend deprivation index, education, income, employment status, self-reported health, BMI, physical activity, family history of dementia, non-home cooked food consumption, energy OTHERs. <sup>3</sup>Data are raw mean (SD) scores of each cognitive function test. <sup>4</sup>Positive beta-coefficients for FI (difference in 13-point score) and SDS (difference in number of correct substitutions) and OR >1 for PM (correct on first attempt) correspond to higher performance compared to MIND tertile 1. <sup>5</sup>Negative beta-coefficients for Pairs (difference in (log-transformed) number of errors), RT (difference in time,

seconds, to respond), Trails A and Trails B (difference in (log transformed) time to complete) correspond to higher performance compared to MIND tertile 1.

**Supplementary Table S8. MIND score×Education (higher vs lower) interaction tests.**

| Cognition Test <sup>1</sup> | Definition of higher education |          |                         |          |
|-----------------------------|--------------------------------|----------|-------------------------|----------|
|                             | College/university             |          | Level 4+ qualifications |          |
|                             | Interaction $\beta$            | <i>P</i> | Interaction $\beta$     | <i>P</i> |
| FI                          | −0.05                          | <0.0001  | −0.009                  | 0.33     |
| RT                          | 0.53                           | 0.06     | 0.85                    | 0.009    |
| Pairs                       | 0.003                          | 0.09     | 0.002                   | 0.28     |
| SDS                         | −0.07                          | 0.0001   | −0.04                   | 0.04     |
| Trail A                     | 0.003                          | 0.006    | 0.005                   | 0.0006   |
| Trail B                     | 0.005                          | <0.0001  | 0.004                   | 0.004    |
| PM                          | −0.05                          | <0.0001  | −0.07                   | <0.0001  |

<sup>1</sup>Higher FI, SDS and PM scores correspond to higher performance; lower RT, Pairs, Trail A and Trail B scores correspond to higher performance.

**Supplementary Table S9. Associations between adherence to AHEI and cognitive ability among participants aged 55+ years.**

|                                        | <i>n</i> | Test Score <sup>3</sup> | Model 1 <sup>1</sup>     |          | Model 2 <sup>2</sup>    |          |
|----------------------------------------|----------|-------------------------|--------------------------|----------|-------------------------|----------|
|                                        |          |                         | β (95% CI)               | <i>P</i> | β (95% CI)              | <i>P</i> |
| <sup>4</sup> Fluid Intelligence        |          |                         |                          |          |                         |          |
| AHEI T1                                | 11780    | 6.77 (2.03)             | Reference                |          | Reference               |          |
| AHEI T2                                | 11868    | 6.68 (2.02)             | −0.03 (−0.08, 0.02)      | 0.24     | −0.09 (−0.14, −0.04)    | 0.0003   |
| AHEI T3                                | 12105    | 6.59 (1.99)             | −0.06 (−0.11, −0.010)    | 0.02     | −0.21 (−0.26, −0.16)    | <0.0001  |
| AHEI score (raw), linear trend         |          |                         | −0.002 (−0.003, −0.0003) | 0.02     | −0.007 (−0.008, −0.006) | <0.0001  |
| AHEI score (per SD), linear trend      |          |                         | −0.02 (−0.05, −0.004)    |          | −0.10 (−0.12, −0.08)    |          |
| <sup>5</sup> Reaction Time             |          |                         |                          |          |                         |          |
| AHEI T1                                | 26103    | 559 (102)               | Reference                |          | Reference               |          |
| AHEI T2                                | 26095    | 563 (102)               | 0.31 (−1.43, 2.05)       | 0.73     | 1.30 (−0.45, 3.05)      | 0.15     |
| AHEI T3                                | 26073    | 566 (103)               | 0.40 (−1.37, 2.16)       | 0.66     | 2.29 (0.48, 4.09)       | 0.0008   |
| AHEI score (raw), linear trend         |          |                         | 0.03 (−0.02, 0.09)       | 0.21     | 0.10 (0.04, 0.15)       | 0.0004   |
| AHEI score (per SD), linear trend      |          |                         | 0.47 (−0.26, 1.19)       |          | 1.35 (0.61, 2.10)       |          |
| <sup>5</sup> Pairs Matching            |          |                         |                          |          |                         |          |
| AHEI T1                                | 25969    | 1.43 (0.62)             | Reference                |          | Reference               |          |
| AHEI T2                                | 25920    | 1.46 (0.62)             | 0.03 (0.02, 0.04)        | <0.0001  | 0.03 (0.02, 0.04)       | <0.0001  |
| AHEI T3                                | 25864    | 1.47 (0.62)             | 0.04 (0.03, 0.05)        | <0.0001  | 0.04 (0.03, 0.05)       | <0.0001  |
| AHEI score (raw), linear trend         |          |                         | 0.001 (0.001, 0.002)     | <0.0001  | 0.0013 (0.0010, 0.0017) | <0.0001  |
| AHEI score (per SD), linear trend      |          |                         | 0.018 (0.014, 0.022)     |          | 0.018 (0.013, 0.022)    |          |
| <sup>4</sup> Symbol Digit Substitution |          |                         |                          |          |                         |          |
| AHEI T1                                | 15277    | 19.0 (4.8)              | Reference                |          | Reference               |          |
| AHEI T2                                | 15540    | 18.7 (4.8)              | −0.12 (−0.23, 0.02)      | 0.02     | −0.24 (−0.34 −0.14)     | <0.0001  |
| AHEI T3                                | 15807    | 18.6 (4.8)              | −0.24 (−0.35, −0.14)     | <0.0001  | −0.44 (−0.54, −0.34)    | <0.0001  |
| AHEI score (raw), linear trend         |          |                         | −0.007 (−0.01, −0.004)   | <0.0001  | −0.014 (−0.017, −0.010) | <0.0001  |
| AHEI score (per SD), linear trend      |          |                         | −0.10 (−0.14, −0.06)     |          | −0.19 (−0.24, −0.15)    |          |
| <sup>5</sup> Trail A                   |          |                         |                          |          |                         |          |
| AHEI T1                                | 13555    | 3.63 (0.31)             | Reference                |          | Reference               |          |
| AHEI T2                                | 13505    | 3.65 (0.31)             | 0.005 (−0.002, 0.01)     | 0.14     | 0.010 (0.003, 0.017)    | 0.005    |
| AHEI T3                                | 13729    | 3.66 (0.31)             | 0.01 (0.003, 0.02)       | 0.008    | 0.018 (0.010, 0.025)    | <0.0001  |
| AHEI score (raw), linear trend         |          |                         | 0.0003 (0.00005, 0.0005) | 0.02     | 0.0005 (0.0003, 0.0008) | <0.0001  |
| AHEI score (per SD), linear trend      |          |                         | 0.004 (0.0007, 0.007)    |          | 0.007 (0.004, 0.01)     |          |
| <sup>5</sup> Trail B                   |          |                         |                          |          |                         |          |
| AHEI T1                                | 13555    | 4.17 (0.32)             | Reference                |          | Reference               |          |
| AHEI T2                                | 13504    | 4.19 (0.32)             | 0.007 (−0.0008, 0.01)    | 0.08     | 0.016 (0.009, 0.023)    | <0.0001  |
| AHEI T3                                | 13729    | 4.21 (0.32)             | 0.015 (0.007, 0.022)     | <0.0001  | 0.03 (0.02, 0.04)       | <0.0001  |
| AHEI score (raw), linear trend         |          |                         | 0.0005 (0.0002, 0.0007)  | <0.0001  | 0.0011 (0.0008, 0.0013) | <0.0001  |
| AHEI score (per SD), linear trend      |          |                         | 0.006 (0.003, 0.01)      |          | 0.015 (0.012, 0.018)    |          |
| <sup>4</sup> Prospective Memory Test   |          |                         |                          |          |                         |          |
|                                        | <i>n</i> | % correct               | OR (95% CI)              | <i>P</i> | OR (95% CI)             | <i>P</i> |
| AHEI T1                                | 11867    | 85                      | Reference                |          | Reference               |          |
| AHEI T2                                | 11972    | 83                      | 0.90 (0.83, 0.96)        | 0.002    | 0.88 (0.82, 0.94)       | 0.0004   |
| AHEI T3                                | 12181    | 83                      | 0.93 (0.87, 1.00)        | 0.06     | 0.90 (0.83, 0.96)       | 0.003    |
| AHEI score (raw), linear trend         |          |                         | 1.00 (0.99, 1.00)        | 0.04     | 1.00 (0.99, 1.00)       | 0.0009   |
| AHEI score (per SD), linear trend      |          |                         | 0.97 (0.94, 1.00)        |          | 0.95 (0.92, 0.98)       |          |

<sup>1</sup>Model 1: adjusted for age, sex and self-reported race/ethnicity. <sup>2</sup>Model 2: adjusted for age, sex, race/ethnicity, education, Townsend deprivation index, income, employment status, family history of dementia; history of hypertension, diabetes, heart disease, stroke and depression; self-reported health, smoking, physical activity, BMI, fast meal consumption and energy intake. <sup>3</sup>Data are raw mean (SD) scores of each cognitive function test. <sup>4</sup>Positive beta-coefficients for FI (difference in 13-point score) and SDS (difference in number of correct substitutions) and OR >1 for PM (correct on first attempt) correspond to higher performance compared to AHEI tertile 1. <sup>5</sup>Negative beta-coefficients for Pairs

---

(difference in (log-transformed) number of errors), RT (difference in time, seconds, to respond), Trails A and Trails B (difference in (log transformed) time to complete) correspond to higher performance compared to AHEI tertile 1.

**Supplementary Table S10. Cognitive ability and incident dementia (age 55+ years at baseline).**

| Cognitive Test <sup>3</sup>            | Total <i>n</i> /cases <sup>3</sup> | All-Cause Dementia   |          |                      |          |
|----------------------------------------|------------------------------------|----------------------|----------|----------------------|----------|
|                                        |                                    | Model 1 <sup>1</sup> |          | Model 2 <sup>2</sup> |          |
|                                        |                                    | HR (95% CI)          | <i>P</i> | HR (95% CI)          | <i>P</i> |
| <sup>4</sup> Fluid Intelligence        | 35753/362                          | 0.88 (0.83, 0.93)    | <0.0001  | 0.89 (0.84, 0.94)    | <0.0001  |
| <sup>5</sup> Reaction Time             | 78271/834                          | 1.00 (1.00, 1.00)    | <0.0001  | 1.00 (1.00, 1.00)    | 0.0004   |
| <sup>5</sup> Pairs Matching            | 77753/819                          | 1.22 (1.09, 1.37)    | 0.0006   | 1.21 (1.08, 1.36)    | 0.001    |
| <sup>4</sup> Symbol Digit Substitution | 46625/347                          | 0.87 (0.85, 0.88)    | <0.0001  | 0.87 (0.86, 0.89)    | <0.0001  |
| <sup>5</sup> Trail A                   | 40789/265                          | 2.57 (1.81, 3.65)    | <0.0001  | 2.30 (1.62, 3.26)    | <0.0001  |
| <sup>5</sup> Trail B                   | 40788/265                          | 6.06 (4.34, 8.46)    | <0.0001  | 5.48 (3.87, 7.75)    | <0.0001  |
| <sup>4</sup> Prospective Memory        | 36020/373                          | 0.65 (0.51, 0.82)    | 0.0004   | 0.69 (0.54, 0.87)    | 0.002    |

<sup>1</sup>Model 1: adjusted for age, sex and self-reported race/ethnicity. <sup>2</sup>Model 2: adjusted for age, sex, race/ethnicity, education, Townsend deprivation index, income, employment status, family history of dementia; history of hypertension, diabetes, heart disease, stroke and depression; self-reported health, smoking, physical activity, BMI, fast meal consumption and energy intake. <sup>3</sup>Test administered at baseline assessment center or on-line but with follow-up starting from first WebQ (see Methods). <sup>4</sup>OR >1 imply better performance on FI (per 13-point score), SDS (per number of correct substitutions) and PM (correct on first attempt) associate with increased risk. <sup>5</sup>OR >1 imply worse performance on Pairs (per (log-transformed) number of errors), RT (per time, seconds, to respond), Trails A and Trails B (per (log transformed) time to complete) associate with increased risk.

**Supplementary Table S11. MIND/AHEI-2010 Adherence and Incident Dementia by Sex<sup>1</sup>.**

| MIND                            |                             |              |                           |          | AHEI-2010                   |              |                           |          |  |
|---------------------------------|-----------------------------|--------------|---------------------------|----------|-----------------------------|--------------|---------------------------|----------|--|
| Model                           | Females ( <i>n</i> = 41877) |              | Males ( <i>n</i> = 35521) |          | Females ( <i>n</i> = 41877) |              | Males ( <i>n</i> = 35521) |          |  |
|                                 | HR (95% CI)                 | <i>P</i>     | HR (95% CI)               | <i>P</i> | HR (95% CI)                 | <i>P</i>     | HR (95% CI)               | <i>P</i> |  |
| All-Cause Dementia <sup>2</sup> |                             |              |                           |          |                             |              |                           |          |  |
| T1                              | Ref                         |              | Ref                       |          | Ref                         |              | Ref                       |          |  |
| T2                              | 1.01 (0.79, 1.30)           | 0.91         | 1.07 (0.86, 1.33)         | 0.57     | 0.84 (0.65, 1.08)           | 0.17         | 1.00 (0.80, 1.25)         | 0.99     |  |
| T3                              | <b>0.71 (0.54, 0.93)</b>    | <b>0.01</b>  | 1.16 (0.89, 1.51)         | 0.26     | <b>0.77 (0.60, 0.99)</b>    | <b>0.04</b>  | 1.01 (0.79, 1.30)         | 0.93     |  |
| Diet score (raw), linear trend  | <b>0.93 (0.88, 0.98)</b>    | <b>0.008</b> | 1.05 (0.99, 1.10)         | 0.11     | <b>0.99 (0.98, 1.00)</b>    | <b>0.006</b> | 1.00 (0.99, 1.01)         | 0.80     |  |
| Diet score (1 SD), linear trend | <b>0.87 (0.78, 0.96)</b>    |              | 1.09 (0.98, 1.21)         |          | <b>0.86 (0.77, 0.96)</b>    |              | 1.01 (0.92, 1.12)         |          |  |
| Alzheimer's Dementia            |                             |              |                           |          |                             |              |                           |          |  |
| T1                              | Ref                         |              | Ref                       |          | Ref                         |              | Ref                       |          |  |
| T2                              | 1.10 (0.75, 1.63)           | 0.62         | 0.89 (0.63, 1.26)         | 0.52     | 0.78 (0.52, 1.17)           | 0.23         | 1.11 (0.78, 1.58)         | 0.58     |  |
| T3                              | 0.84 (0.55, 1.28)           | 0.41         | 1.15 (0.77, 1.72)         | 0.49     | 0.86 (0.59, 1.26)           | 0.44         | 1.09 (0.73, 1.60)         | 0.68     |  |
| Diet score (raw), linear trend  | 0.95 (0.87, 1.03)           | 0.23         | 1.07 (0.98, 1.16)         | 0.12     | 0.99 (0.98, 1.01)           | 0.28         | 1.01 (1.00, 1.02)         | 0.18     |  |
| Diet score (1 SD), linear trend | 0.91 (0.77, 1.06)           |              | 1.14 (0.97, 1.34)         |          | 0.91 (0.78, 1.08)           |              | 1.12 (0.95, 1.31)         |          |  |

<sup>1</sup>Results from Cox-proportional hazard models adjusted for age, self-reported race/ethnicity, education, Townsend deprivation index, income, employment status, global cognition score, family history of dementia; history of hypertension, diabetes, heart disease, stroke and depression; self-reported health, smoking, physical activity, BMI, fast meal consumption and energy intake. Results in bold-face are statistically significant. <sup>2</sup>*P*=0.008 for MIND×sex and *P*=0.07 for AHEI×sex.

**Supplementary Table S12. Individual MIND components and cognitive health (model 2).**

| MIND Component                      | Poor Cognitive Ability |               |                |      |         |         |     | Dementia  |             |
|-------------------------------------|------------------------|---------------|----------------|------|---------|---------|-----|-----------|-------------|
|                                     | Fluid Intelligence*    | Reaction time | Pairs Matching | SDS* | Trail A | Trail B | PM* | All-Cause | Alzheimer's |
| Higher green leafy intake           | +                      | +             | +              | +    | +       | +       | +   | -         | +           |
| Higher other vegetables intake      | -                      | -             | -              | -    | -       | -       | -   | -         | -           |
| Higher berry intake                 | -                      | +             | +              | -    | +       | +       | +   | -         | -           |
| Higher bean intake                  | -                      | -             | +              | +    | +       | +       | +   | -         | +           |
| Higher whole grains intake          | +                      | +             | +              | +    | +       | +       | -   | -         | -           |
| Higher nut intake                   | +                      | -             | -              | -    | -       | +       | -   | -         | +           |
| Higher fish intake                  | -                      | -             | -              | -    | -       | -       | -   | -         | -           |
| Olive oil primary cooking oil       | +                      | +             | +              | +    | +       | +       | +   | +         | +           |
| Higher poultry intake               | -                      | -             | -              | -    | -       | -       | -   | -         | -           |
| Lower butter/margarine intake       | +                      | -             | -              | -    | +       | +       | +   | +         | +           |
| Lower cheese intake                 | +                      | +             | +              | +    | +       | +       | +   | +         | +           |
| Lower processed and red meat intake | +                      | +             | +              | +    | +       | +       | +   | +         | +           |
| Lower fast fried food intake        | -                      | +             | +              | +    | +       | +       | -   | +         | +           |
| Lower sweets/pastry intake          | +                      | +             | +              | +    | +       | +       | +   | +         | +           |
| Moderate wine intake                | -                      | -             | -              | -    | -       | -       | -   | -         | -           |

\*original score estimates (see Table 2) reversed to allow comparison across outcomes. Better cognition/decreased risk of dementia  $P < 0.05$   $P < 0.0001$ . Poor cognition/increased risk of dementia  $P < 0.05$   $P < 0.0001$

**Supplementary Table S13. Individual AHEI-2010 components and cognitive health (model 2).**

| AHEI Component                                | Poor Cognitive Ability |               |                |      |         |         |     | Dementia  |             |
|-----------------------------------------------|------------------------|---------------|----------------|------|---------|---------|-----|-----------|-------------|
|                                               | Fluid Intelligence*    | Reaction time | Pairs Matching | SDS* | Trail A | Trail B | PM* | All-Cause | Alzheimer's |
| Higher vegetables                             | +                      | -             | +              | +    | +       | +       | +   | -         | -           |
| Higher fruit (not juice)                      | +                      | +             | +              | +    | +       | +       | +   | +         | +           |
| Higher whole grains                           | +                      | +             | +              | +    | +       | +       | +   | -         | -           |
| Lower sugar sweetened beverages + fruit juice | +                      | +             | +              | +    | +       | +       | +   | -         | +           |
| Higher nuts & legumes                         | +                      | -             | +              | +    | +       | +       | +   | -         | +           |
| Lower red meat & products                     | +                      | +             | +              | +    | +       | +       | +   | +         | -           |
| Lower trans fat                               | +                      | -             | -              | -    | +       | +       | +   | -         | +           |
| Higher long chain (n-3) fats (EPA +DHA)       | -                      | -             | -              | -    | -       | -       | -   | -         | -           |
| Higher PUFA                                   | -                      | +             | -              | -    | -       | -       | -   | -         | -           |
| Lower sodium                                  | -                      | +             | -              | -    | -       | -       | -   | -         | -           |
| Moderate alcohol                              | -                      | -             | +              | -    | -       | -       | -   | -         | -           |

\*original score estimates (see Table 2) reversed to allow comparison across outcomes. Better cognition/decreased risk of dementia  $P < 0.05$   $P < 0.0001$ . Poor cognition/increased risk of dementia  $P < 0.05$   $P < 0.0001$

---

## Supplementary References

1. McDaniel, M.A.; Scullin, M.K. Implementation intention encoding does not automatize prospective memory responding. *Memory & Cognition* **2010**, *38*, 221–232.
2. Cleutjens, F.A.; Spruit, M.A.; Ponds, R.W.; Dijkstra, J.B.; Franssen, F.M.; Wouters, E.F.; Janssen, D.J. Cognitive functioning in obstructive lung disease: results from the United Kingdom biobank. *Journal of the American Medical Directors Association* **2014**, *15*, 214–219.
3. Lyall, D.M.; Cullen, B.; Allerhand, M.; Smith, D.J.; Mackay, D.; Evans, J.; Anderson, J.; Fawns–Ritchie, C.; McIntosh, A.M.; Deary, I.J. Cognitive test scores in UK Biobank: data reduction in 480,416 participants and longitudinal stability in 20,346 participants. *PLoS one* **2016**, *11*, e0154222.
4. Hagenaars, S.P.; Harris, S.E.; Davies, G.; Hill, W.D.; Liewald, D.C.; Ritchie, S.J.; Marioni, R.E.; Fawns–Ritchie, C.; Cullen, B.; Malik, R., et al. Shared genetic aetiology between cognitive functions and physical and mental health in UK Biobank (N=112 151) and 24 GWAS consortia. *Molecular psychiatry* **2016**, *21*, 1624–1632, doi:10.1038/mp.2015.225.
5. UK Biobank Coordinating Centre. Cognitive Function Tests: Assessment Centre. Available online: <http://biobank.ctsu.ox.ac.uk/crystal/label.cgi?id=100026> (accessed on October).
6. Davies, G.; Lam, M.; Harris, S.E.; Trampush, J.W.; Luciano, M.; Hill, W.D.; Hagenaars, S.P.; Ritchie, S.J.; Marioni, R.E.; Fawns–Ritchie, C. Study of 300,486 individuals identifies 148 independent genetic loci influencing general cognitive function. *Nature communications* **2018**, *9*, 2098.
7. Shen, X.; Cox, S.R.; Adams, M.J.; Howard, D.M.; Lawrie, S.M.; Ritchie, S.J.; Bastin, M.E.; Deary, I.J.; McIntosh, A.M.; Whalley, H.C. Resting–State Connectivity and Its Association With Cognitive Performance, Educational Attainment, and Household Income in the UK Biobank. *Biol Psychiatry Cogn Neurosci Neuroimaging* **2018**, *3*, 878–886, doi:10.1016/j.bpsc.2018.06.007.
8. Cullen, B.; Newby, D.; Lee, D.; Lyall, D.M.; Nevado–Holgado, A.J.; Evans, J.J.; Pell, J.P.; Lovestone, S.; Cavanagh, J. Cross–sectional and longitudinal analyses of outdoor air pollution exposure and cognitive function in UK Biobank. *Scientific reports* **2018**, *8*, 12089.
9. Hill, W.D.; Davies, G.; Harris, S.E.; Hagenaars, S.P.; Liewald, D.C.; Penke, L.; Gale, C.R.; Deary, I.J.; Grp, N.C.W. Molecular genetic aetiology of general cognitive function is enriched in evolutionarily conserved regions. *Translational psychiatry* **2016**, *6*, e980, doi:ARTN e980 10.1038/tp.2016.246.
10. Hagenaars, S.P.; Gale, C.R.; Deary, I.J.; Harris, S.E. Cognitive ability and physical health: a Mendelian randomization study. *Scientific reports* **2017**, *7*, 2651.
11. Nevado–Holgado, A.J.; Kim, C.–H.; Winchester, L.; Gallacher, J.; Lovestone, S. Commonly prescribed drugs associate with cognitive function: a cross–sectional study in UK Biobank. *BMJ open* **2016**, *6*, e012177.
12. Ge, T.; Chen, C.Y.; Doyle, A.E.; Vettermann, R.; Tuominen, L.J.; Holt, D.J.; Sabuncu, M.R.; Smoller, J.W. The Shared Genetic Basis of Educational Attainment and Cerebral Cortical Morphology. *Cereb Cortex* **2019**, *29*, 3471–3481, doi:10.1093/cercor/bhy216.
